# Supplementary material for: Achieving metal-like malleability and ductility in Ag2Te1-xSx inorganic thermoelectric semiconductors with high mobility
Source: PubMed Central journal article supplement — Innovation (Camb). 2022 Oct 18;3(6):100341. doi: 10.1016/j.xinn.2022.100341 (PMC9638828; doi:10.1016/j.xinn.2022.100341), 2022-10-18
Supplement: mmc1.pdf [file mmc1.pdf]

The Innovation, Volume 3

## Supplemental Information

**Achieving metal-like malleability and ductility in  $\text{Ag}_2\text{Te}_{1-x}\text{S}_x$  inorganic thermoelectric semiconductors with high mobility**

Huiping Hu, Yuechu Wang, Chenguang Fu, Xinbing Zhao, and Tiejun Zhu

1 **Supplemental Information**

2 **Achieving metal-like malleability and ductility in  $\text{Ag}_2\text{Te}_{1-x}\text{S}_x$  inorganic**  
3 **thermoelectric semiconductors with high mobility**

4 Huiping Hu,<sup>1</sup> Yuechu Wang,<sup>1</sup> Chenguang Fu,<sup>1,\*</sup> Xinbing Zhao,<sup>1</sup> and Tiejun Zhu<sup>1,\*</sup>

5 <sup>1</sup>*State Key Laboratory of Silicon Materials, and School of Materials Science and Engineering,*  
6 *Zhejiang University, Hangzhou 310027, China*

7 \*Corresponding author.

8 *E-mail addresses:* [chenguang\\_fu@zju.edu.cn](mailto:chenguang_fu@zju.edu.cn) (Chenguang Fu), [zhutj@zju.edu.cn](mailto:zhutj@zju.edu.cn) (Tiejun Zhu)

9

# Supplemental Information

## Supplemental Information including:

### Materials and Methods

### Figures S1 to S7

### Note 1

## Supplemental Materials and Methods

**Synthesis of quenched and annealed sample** To synthesize the quenched samples, raw elements Ag (99.9%, shot), Te (99.999%, chunk), and S (99.999%, powder) were weighted according to the stoichiometric  $\text{Ag}_2\text{Te}_{1-x}\text{S}_x$  ( $x = 0 \sim 0.5$ ) into quartz tubes and sealed under high vacuum. To protect the tubes from the explosion, the heating rate was set slowly during the melting process. Firstly, the tubes were heated to 773 K at the rate of 2 K  $\text{min}^{-1}$ , held at this temperature for 4 h, and then heated to 1073 K at the rate of 1 K  $\text{min}^{-1}$ , held at this temperature for 4 h, and then heated to 1273 K at the rate of 0.5 K  $\text{min}^{-1}$ , kept at this temperature for 12 h in a chamber furnace. Subsequently, the tubes were quenched in cold water to obtain final quenched ingots. For obtaining the annealed samples, the quenched ingots were sealed in tubes with evacuating to  $10^{-3}$  Pa, annealed at 723 K for 7 days to facilitate the formation of cubic phase, and naturally cooled to room temperature in the furnace. The quenched and annealed ingots were used for studying TE and mechanical properties. In addition, to obtain the furnace-cooled ingot, the sample was heated to 1273 K at the same heating rate as the quenched sample, held for 12 h, and naturally cooled to room temperature in the furnace.

**Characterization** The phase structure of all samples was characterized by an X-ray diffraction system (XRD, PANalytical, Aeris DY866) equipped with a high-temperature stage using Cu  $K\alpha$  radiation ( $\lambda = 1.5406 \text{ \AA}$ ). The variable temperature XRD patterns were recorded following the heating protocol between 323 K to 773 K. The microstructure and elemental distribution

1 were characterized by field emission scanning electron microscopy (SEM, Hitachi, SU-8010)  
2 equipped with energy-dispersive X-ray spectroscopy (EDS) and electron probe microanalysis  
3 (EPMA, JOEL, JXA-8100) with a wavelength-dispersive spectroscope (WDS). Differential  
4 scanning calorimeter (DSC, TA, Q200) measurements were performed in nitrogen flux to  
5 investigate the phase transition with a heating rate of 5 K min<sup>-1</sup>. Uniaxial compression tests and  
6 tensile tests on the bulk specimens were carried out on a universal machine (Siomt, JVI-20s)  
7 with a loading rate of 0.5 mm min<sup>-1</sup>. The cuboids in the size of 3 × 3 × 6 mm<sup>3</sup> were used for  
8 compression tests and dog bone-shaped specimens (7 × 20 × 1 mm<sup>3</sup>) processed by wire cutting  
9 were used for tensile tests. The electrical conductivity  $\sigma$  and the Seebeck coefficient  $S$  were  
10 simultaneously measured between 300 and 573 K on a commercial Linseis LSR-3 system in a  
11 helium atmosphere. The total thermal conductivity  $\kappa$  was calculated via  $\kappa = D \times C_p \times \rho$ , where the  
12 thermal diffusivity  $D$  was measured by laser flash method (Netzsch, LFA457) and the density  
13  $\rho$  was measured by the Archimedes method, and the specific heat capacity  $C_p$  was estimated  
14 using the Dulong-Petit value. The Hall carrier concentration  $n_H$  and Hall mobility  $\mu_H$  were  
15 calculated by  $n_H = 1/eR_H$  and  $\mu_H = \sigma R_H$  respectively, where  $e$  is the unit charge,  $R_H$  is the Hall  
16 coefficient which was measured by a Mini Cryogen Free Measurement system with the  
17 magnetic field varying from -4 T to 4 T.

18

1 **Supplemental Figures**

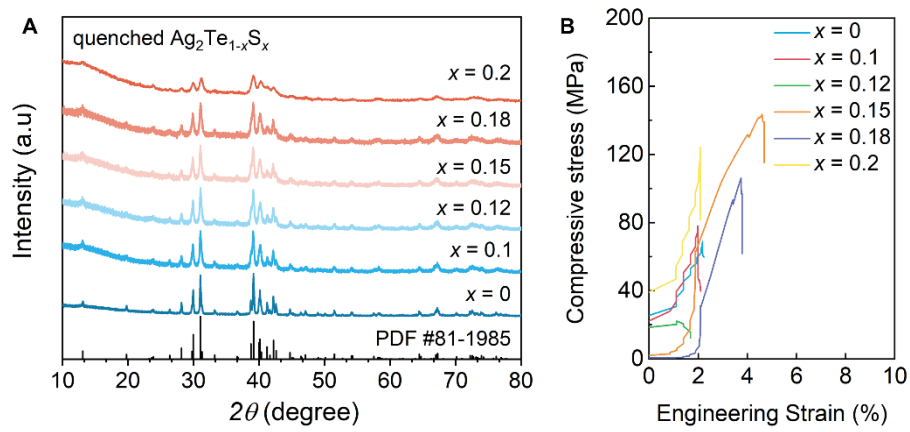

2

3 **Figure S1. Crystal structure and mechanical properties of quenched  $\text{Ag}_2\text{Te}_{1-x}\text{S}_x$  ( $x \leq 0.2$ ).** (A) Powder

4 XRD patterns. (B) Compressive stress-strain curves.

5

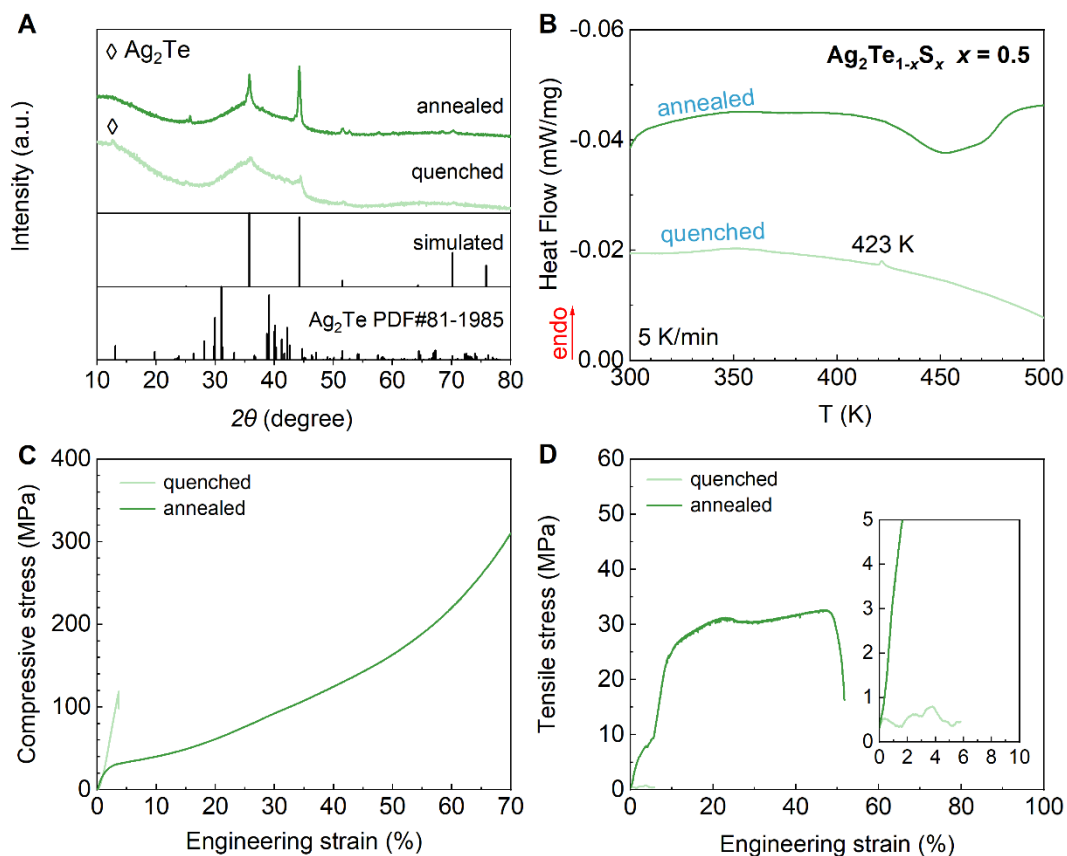

1  
2 **Figure S2. Elimination of monoclinic  $\text{Ag}_2\text{Te}$  phase in inorganic semiconductor  $\text{Ag}_2\text{Te}_{0.5}\text{S}_{0.5}$ .** (A) Room-  
3 temperature bulk XRD patterns of the quenched and annealed  $\text{Ag}_2\text{Te}_{0.5}\text{S}_{0.5}$  samples. The simulated patterns  
4 by VESTA are displayed for comparison. (B) DSC heating curves for quenched and annealed  $\text{Ag}_2\text{Te}_{0.5}\text{S}_{0.5}$   
5 samples with a heating rate of 5 K/min. Stress-strain diagrams for quenched and annealed  $\text{Ag}_2\text{Te}_{0.5}\text{S}_{0.5}$   
6 samples in the compressive test (C) and the tensile test (D).

7

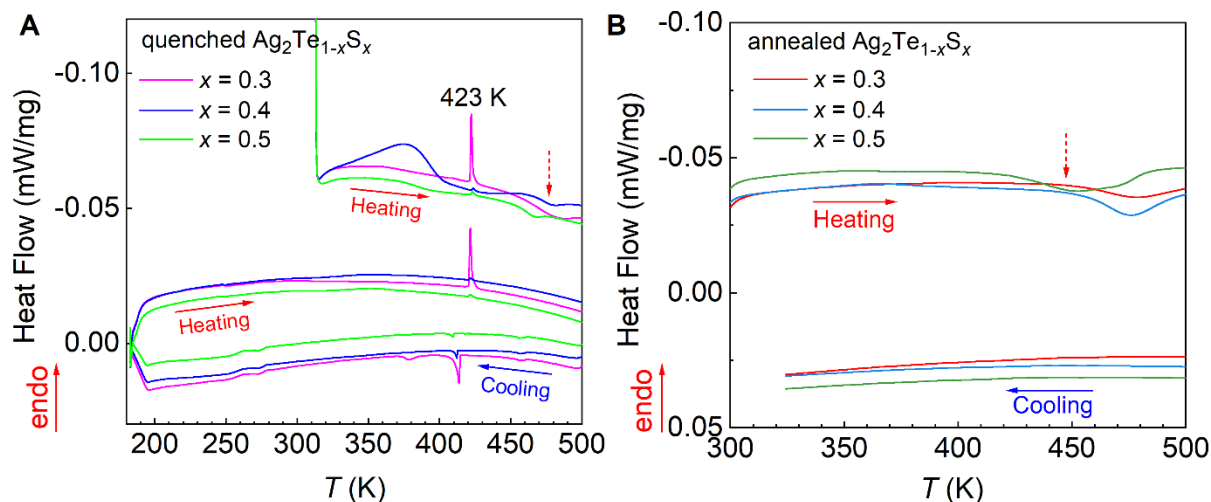

1  
2 **Figure S3. DSC curves for quenched and annealed  $\text{Ag}_2\text{Te}_{1-x}\text{S}_x$  specimens with a heating rate of 5 K/min.**

3 (A) Quenched  $\text{Ag}_2\text{Te}_{1-x}\text{S}_x$ . The curves of the first heating cycle for the quenched specimens have been shifted  
4 up along the Y axis to avoid overlapping with other measured curves. (B) Annealed  $\text{Ag}_2\text{Te}_{1-x}\text{S}_x$ .

5 Broad bumps around  $2\theta = 30\text{--}50^\circ$  in the bulk XRD results (Figure 2C) reveal the partial  
6 amorphization of the  $\text{Ag}_2\text{Te}_{1-x}\text{S}_x$  materials. In order to detect the glass transition of the solid  
7 amorphous phase in  $\text{Ag}_2\text{Te}_{1-x}\text{S}_x$ , which is an endothermic step change occurred in the heating  
8 DSC traces, low-temperature DSC curves for quenched  $\text{Ag}_2\text{Te}_{1-x}\text{S}_x$  are displayed in Figure S3A.  
9 The process of the thermal scan for the low-temperature DSC curves is firstly heating to the set  
10 temperature, then cooling to the low temperature (200 K), and heating to the set temperature  
11 from the low temperature again. No clear glass transitions are observed in the DSC traces of  
12 the quenched specimens. A slight dip, which is only observed in the first heating cycle of the  
13 thermal scan for all the quenched and annealed  $\text{Ag}_2\text{Te}_{1-x}\text{S}_x$  samples, might be due to the  
14 crystallization of the amorphous phase. However, the wide exothermic peaks of the  
15 crystallization around 450 ~ 500 K are irreversible, and cannot be detected in the following  
16 cooling and reheating process.

17

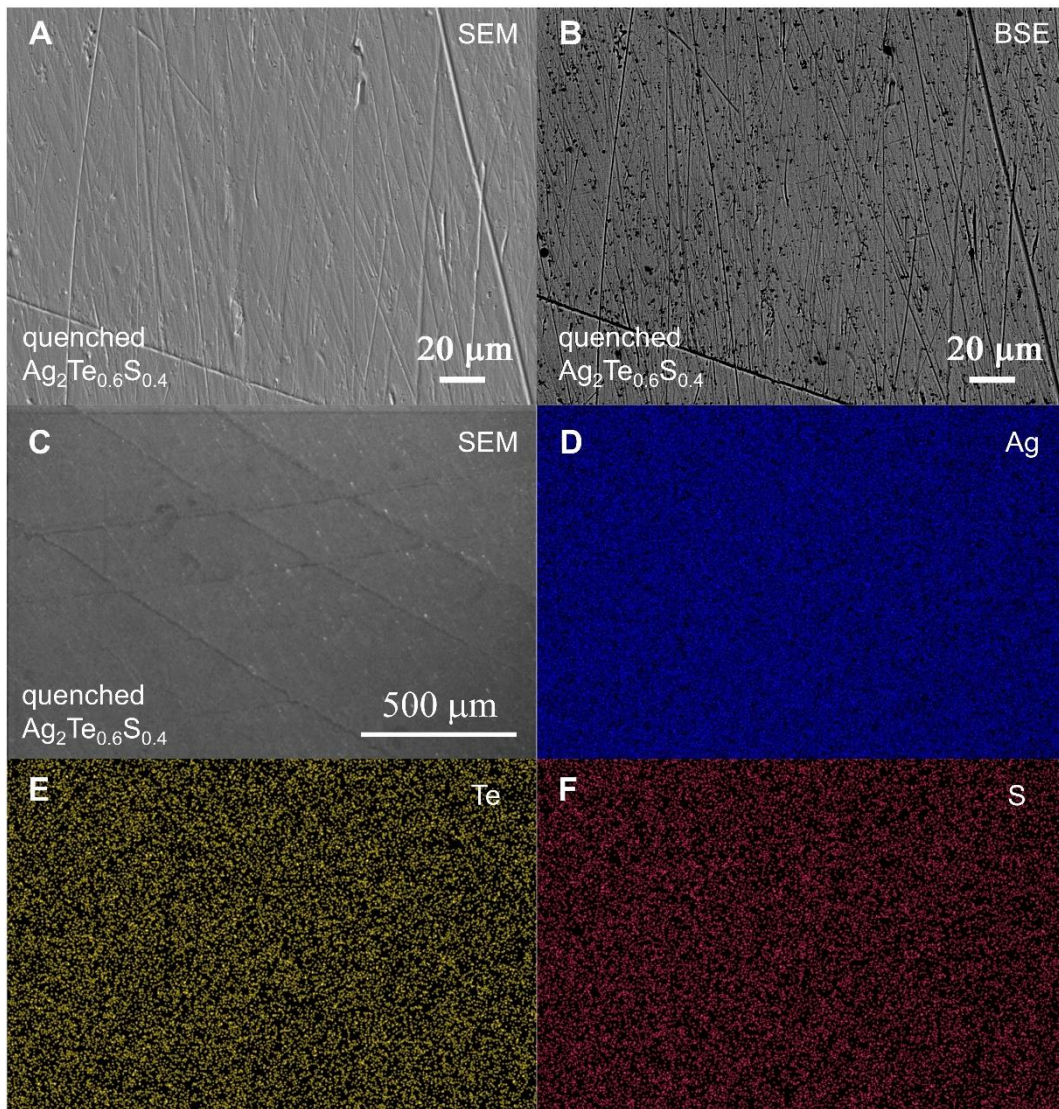

1

2 **Figure S4. Microstructure of quenched  $\text{Ag}_2\text{Te}_{0.6}\text{S}_{0.4}$  sample.** (A) EPMA secondary electron image, and (B)  
3 EPMA backscattered electron image of the polished surfaces. (C) SEM images of the polished surface. (D)  
4 Ag, (E) Te and (F) S elemental distribution in (C).

5

6



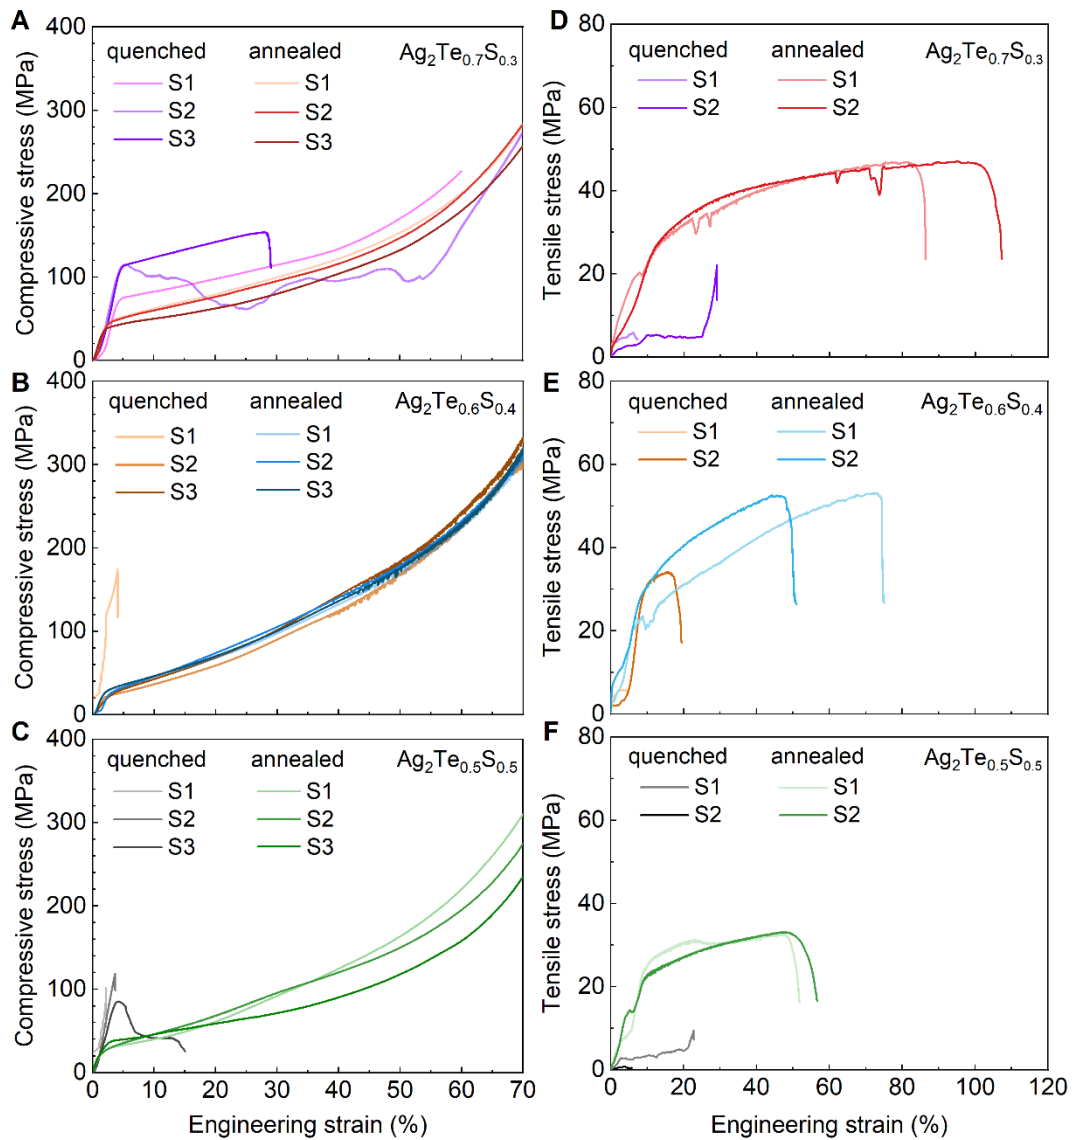

1  
2 **Figure S5. Reproducibility and stability of mechanical properties for inorganic semiconductor  $\text{Ag}_2\text{Te}_{1-x}\text{S}_x$ .**  
3  **$x = 0.3, 0.4,$  and  $0.5$ )** Stress-strain diagrams for quenched and annealed  $\text{Ag}_2\text{Te}_{1-x}\text{S}_x$  specimens in the  
4 compressive test (A), (B) and (C) and the tensile test (D), (E) and (F). S1, S2 and S3 indicate the measured  
5 specimens processed from the same ingot.

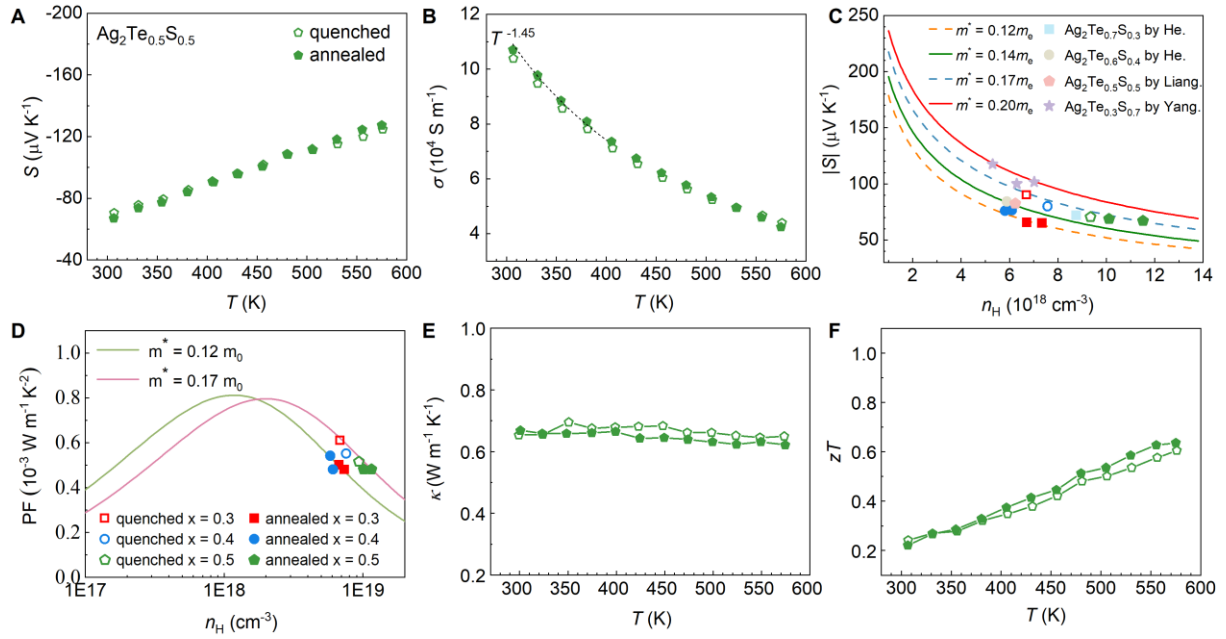

1

2 **Figure S6. Temperature dependence of thermoelectric properties for inorganic semiconductor**

3  **$\text{Ag}_2\text{Te}_{0.5}\text{S}_{0.5}$**  (A) Seebeck coefficient  $S$  and (B) electrical conductivity  $\sigma$  for quenched and annealed

4  $\text{Ag}_2\text{Te}_{0.5}\text{S}_{0.5}$ . (C) Pisarenko plots for  $\text{Ag}_2\text{Te}_{1-x}\text{S}_x$  ( $x = 0.3, 0.4$  and  $0.5$ ) specimens, the lines are calculated by

5 the SPB model with different density-of-states effective mass  $m^*$ . The data for  $\text{Ag}_2\text{Te}_{0.7}\text{S}_{0.3}^1$ ,  $\text{Ag}_2\text{Te}_{0.6}\text{S}_{0.4}^1$ ,

6  $\text{Ag}_2\text{Te}_{0.5}\text{S}_{0.5}^2$ , and  $\text{Ag}_2\text{Te}_{0.3}\text{S}_{0.7}^3$  reported previously are added for comparison. (D) Carrier concentration

7 dependence of power factor  $\text{PF}$  for quenched (hollow symbols) and annealed (solid symbols)  $\text{Ag}_2\text{Te}_{1-x}\text{S}_x$  ( $x$

8  $= 0.3, 0.4$ , and  $0.5$ ) at 300 K. The curves are generated by SPB model. (E) Total thermal conductivity  $\kappa$  and

9 (F)  $zT$  values for quenched and annealed  $\text{Ag}_2\text{Te}_{0.5}\text{S}_{0.5}$ .

10

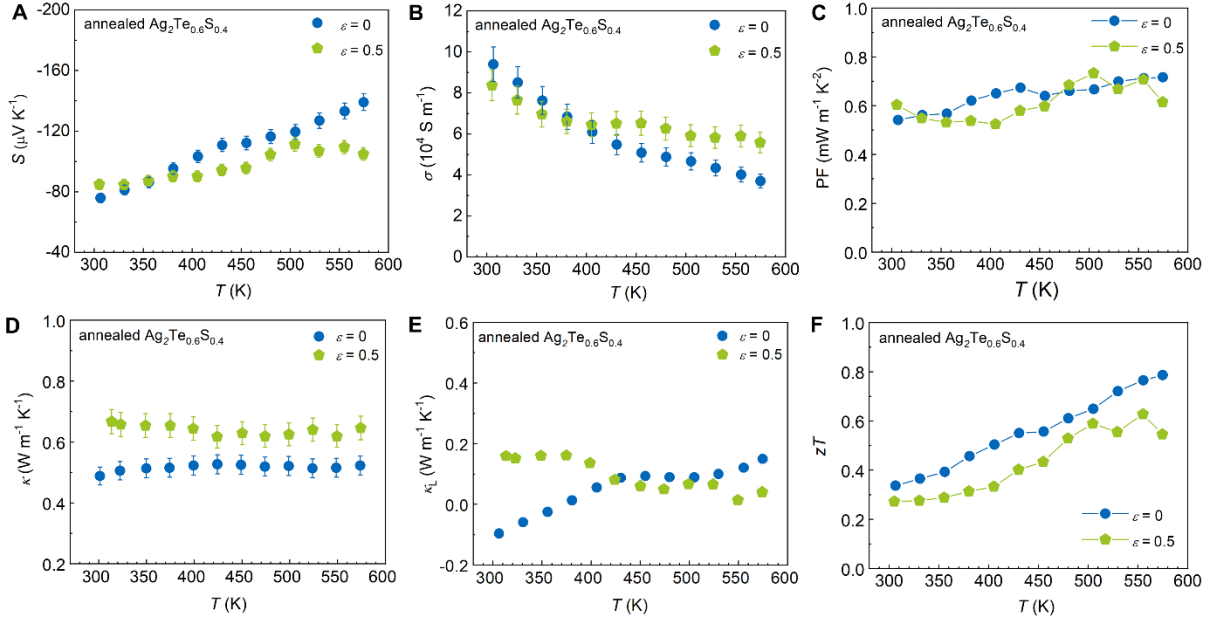

**Figure S7. Effect of compressive deformation on the thermoelectric properties of plastic annealed  $\text{Ag}_2\text{Te}_{0.6}\text{S}_{0.4}$  sample.** Temperature dependence of (A) Seebeck coefficient, (B) electrical conductivity, (C) power factor, (D) total thermal conductivity, (E) lattice thermal conductivity, and (F)  $zT$  values.

The most significant variation is that the thermal conductivity increases with the increasing compressive strain  $\varepsilon$ . Considering that the values of the Seebeck coefficient and the electrical conductivity at room temperature are almost unchanged, the increased thermal conductivity of  $\varepsilon = 0.5$  sample should mainly originate from the increased lattice thermal conductivity. For metals and alloys, the mechanism of plastic deformation is slip and twinning, and the density of dislocations will increase drastically during plastic deformation, which may contribute to a reduction in lattice thermal conductivity. However, the anomalous increase of lattice thermal conductivity with the introduction of compressive deformation in annealed  $\text{Ag}_2\text{Te}_{0.6}\text{S}_{0.4}$  suggests that the plastic deformation mechanism of  $\text{Ag}_2\text{Te}_{1-x}\text{S}_x$  materials is independent of the movement of dislocations

1 **Supplemental Note 1**

2 **Single parabolic band (SPB) model.** The electrical transport properties of  $\text{Ag}_2\text{Te}_{1-x}\text{S}_x$  were  
3 analyzed using the SPB model obtained from the Boltzmann transport equation within the  
4 relaxation time approximation. Assuming the acoustic phonon scattering limits the carrier  
5 mobility and the minority carrier transport is negligible, the related parameters can be expressed  
6 below

7 
$$F_i(\eta) = \int_0^\infty \frac{x^i}{1 + \exp(x - \eta)} dx \quad (1)$$

8 
$$S = -\frac{k_B}{e} \left( \frac{2F_1}{F_0} - \eta \right) \quad (2)$$

9 Where  $\eta$  is the reduced Fermi level,  $k_B$  is the Boltzmann constant,  $e$  is the magnitude of charge  
10 of an electron or hole,  $F_i$  is the Fermi integral, and  $S$  is the Seebeck coefficient.

11 
$$r_H = \frac{3}{2} F_{1/2} \frac{F_{-1/2}}{2F_0^2} \quad (3)$$

12 
$$n_H = \frac{4\pi(2m_d^*k_B T)^{3/2} F_{1/2}}{h^3 r_H}$$

13 Where  $r_H$  is the Hall factor,  $m_d^*$  is the DOS effective mass,  $h$  is the Plank constant,  $T$  is the  
14 absolute temperature, and  $n_H$  is the Hall carrier concentration.

15 
$$\mu_H = \mu_0 \frac{F_{-1/2}}{2F_0} \quad (4)$$

16 
$$\text{PF} = S^2 n_H \mu_H e \quad (5)$$

17 Where  $\mu_0$  is the SPB mobility parameter,  $\mu_H$  is the Hall mobility, and PF is the theoretical power  
18 factor.

## 1 Reference

- 2 1. He, S. Y., Li, Y. B., Liu, L., et al. (2020). Semiconductor glass with superior flexibility and high room  
3 temperature thermoelectric performance. *Sci. Adv.* **6**, eaaz8423.
- 4 2. Liang, X. and Chen, C. (2021). Ductile inorganic amorphous/crystalline composite  $\text{Ag}_4\text{TeS}$  with phonon-  
5 glass electron-crystal transport behavior and excellent stability of high thermoelectric performance on  
6 plastic deformation. *Acta Mater.* **218**, 117231.
- 7 3. Yang, S. Q., Gao, Z. Q., Qiu, P. F., et al. (2021). Ductile  $\text{Ag}_{20}\text{S}_7\text{Te}_3$  with Excellent Shape-Conformability  
8 and High Thermoelectric Performance. *Adv. Mater.* **33**, 2007681.
