# Supplementary material for: Achieving metal-like malleability and ductility in Ag2Te1-xSx inorganic thermoelectric semiconductors with high mobility
Source: PubMed Central journal article supplement — Innovation (Camb). 2022 Oct 18;3(6):100341. doi: 10.1016/j.xinn.2022.100341 (PMC9638828; doi:10.1016/j.xinn.2022.100341), 2022-10-18
Supplement: mmc2.pdf [file mmc2.pdf]

# Achieving metal-like malleability and ductility in $\text{Ag}_2\text{Te}_{1-x}\text{S}_x$ inorganic thermoelectric semiconductors with high mobility

Huiping Hu,<sup>1</sup> Yuechu Wang,<sup>1</sup> Chenguang Fu,<sup>1,\*</sup> Xinbing Zhao,<sup>1</sup> and Tiejun Zhu<sup>1,\*</sup>

\*Correspondence: [chenguang\\_fu@zju.edu.cn](mailto:chenguang_fu@zju.edu.cn) (C.F.); [zhutj@zju.edu.cn](mailto:zhutj@zju.edu.cn) (T.Z.)

Received: June 10, 2022; Accepted: October 13, 2022; Published Online: October 18, 2022; <https://doi.org/10.1016/j.xinn.2022.100341>

© 2022 The Author(s). This is an open access article under the CC BY-NC-ND license (<http://creativecommons.org/licenses/by-nc-nd/4.0/>).

## GRAPHICAL ABSTRACT

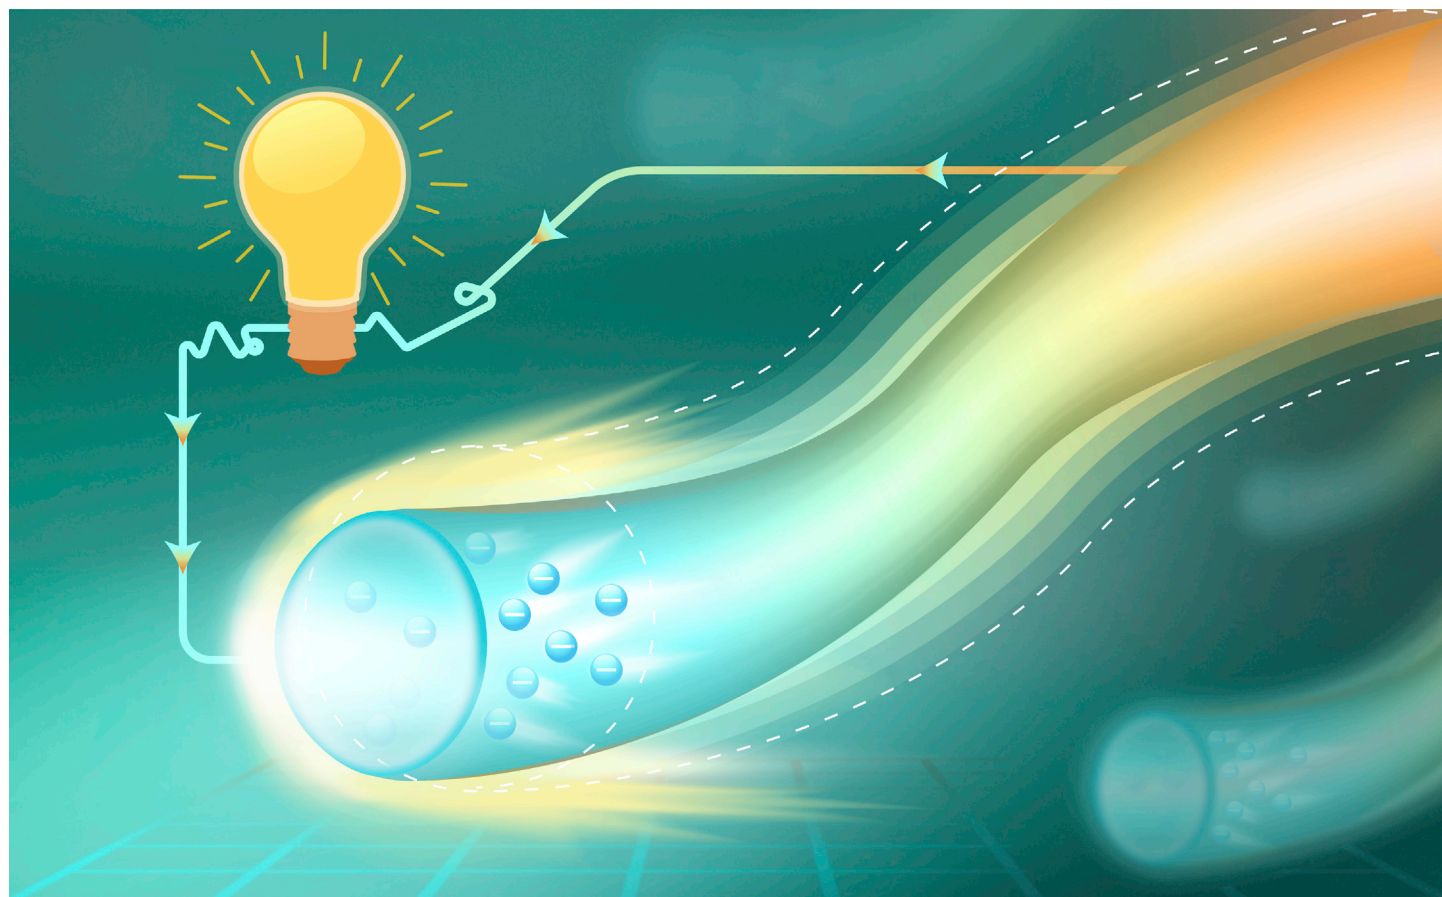

## PUBLIC SUMMARY

- Phase structure plays a crucial role in determining the mechanical properties of inorganic semiconductors  $\text{Ag}_2\text{Te}_{1-x}\text{S}_x$
- Metal-like malleability and ductility with a record-high tensile elongation of 107.3% are achieved in  $\text{Ag}_2\text{Te}_{1-x}\text{S}_x$
- The plastic  $\text{Ag}_2\text{Te}_{1-x}\text{S}_x$  with decent thermoelectric performance could exhibit promising applications in the field of flexible/wearable electronics

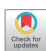

# Achieving metal-like malleability and ductility in $\text{Ag}_2\text{Te}_{1-x}\text{S}_x$ inorganic thermoelectric semiconductors with high mobility

Huiping Hu,<sup>1</sup> Yuechu Wang,<sup>1</sup> Chenguang Fu,<sup>1,\*</sup> Xinbing Zhao,<sup>1</sup> and Tiejun Zhu<sup>1,\*</sup>

<sup>1</sup>State Key Laboratory of Silicon Materials, and School of Materials Science and Engineering, Zhejiang University, Hangzhou 310027, China

\*Correspondence: chenguang\_fu@zju.edu.cn (C.F.); zhutj@zju.edu.cn (T.Z.)

Received: June 10, 2022; Accepted: October 13, 2022; Published Online: October 18, 2022; <https://doi.org/10.1016/j.xinn.2022.100341>

© 2022 The Author(s). This is an open access article under the CC BY-NC-ND license (<http://creativecommons.org/licenses/by-nc-nd/4.0/>).

Citation: Hu H., Wang Y., Fu C., et al., (2022). Achieving metal-like malleability and ductility in  $\text{Ag}_2\text{Te}_{1-x}\text{S}_x$  inorganic thermoelectric semiconductors with high mobility. *The Innovation* 3(6), 100341.

Inorganic semiconductor  $\text{Ag}_2\text{Te}_{1-x}\text{S}_x$  has been recently found to exhibit unexpected plastic deformation with compressive strain up to 30%. However, the origin of the abnormal plasticity and how to simultaneously achieve superb ductility and high mobility are still elusive. Here, we demonstrate that crystalline/amorphous  $\text{Ag}_2\text{Te}_{1-x}\text{S}_x$  ( $x = 0.3, 0.4,$  and  $0.5$ ) composites can exhibit excellent compressive strain up to 70% if the monoclinic  $\text{Ag}_2\text{Te}$  phase, which commonly exists in the matrix, is eliminated. Significantly, an ultra-high tensile elongation reaching 107.3% was found in  $\text{Ag}_2\text{Te}_{0.7}\text{S}_{0.3}$ , which is the highest one yet reported in the system and even surpasses those achieved in some metals and high-entropy alloys. Moreover, high mobility of above  $1000 \text{ cm}^2 \text{ V}^{-1} \text{ s}^{-1}$  at room temperature and good thermoelectric performance are simultaneously maintained. A modified Ashby plot with ductility factor versus carrier mobility is thereby proposed to highlight the potential of solid materials for applications in flexible/wearable electronics.

## INTRODUCTION

Over the last decade, the Internet of Things (IoT) and wearable electronics have experienced rapid growth owing to the demand for an intelligent society. Semiconductors with good thermoelectric (TE) properties have been found to be promising for powering IoT nodes<sup>1</sup> and wearable electronics, such as wearable medical monitoring sensors and handheld devices.<sup>2</sup> TE semiconductor devices,<sup>3,4</sup> which have the advantages of being small in size, noise free, pollution free, and reliable long term, can realize the direct conversion of heat energy to electricity based on the Seebeck effect if a temperature difference exists. In human society, temperature difference exists everywhere, for instance, between the inside and outside of buildings or heat pipes or between the human body and the ambient environment, providing heat sources for powering IoT nodes and wearable electronics by TE devices.<sup>5</sup> The TE performance can be evaluated by the materials' dimensionless figure of merit  $zT$ ,  $zT = S^2\sigma T/\kappa$ , where  $S$ ,  $\sigma$ ,  $T$ , and  $\kappa$  are the Seebeck coefficient, electrical conductivity, absolute temperature, and total thermal conductivity, respectively.<sup>6</sup> TE materials are usually brittle and are typically designed to be a cuboid structure with two flat surfaces attaching to the heat source and sink for applications. However, in practical scenarios, the temperature difference can also exist in objects with curved surfaces, such as heat pipes and human body skin. These drive the ever-increasing demand for high-performance TE semiconductors with both superior deformability and high carrier mobility, facilitating mechanical processability and high carrier transport.

Conventional good TE materials are usually found in inorganic semiconductors, which are inherently brittle, limiting their applications for heat sources with curved surfaces.<sup>7,8</sup> Organic conducting polymers have been used for fabricating flexible TE devices due to their mechanical flexibility and low thermal conductivity.<sup>9</sup> Nevertheless, the power factor (PF),  $\text{PF} = S^2\sigma$ , of organic materials is usually too low, only about  $10^{-6}$ – $10^{-4} \text{ W m}^{-1} \text{ K}^{-2}$ , and the carrier mobilities are between  $\sim 1$  and  $10 \text{ cm}^2 \text{ V}^{-1} \text{ s}^{-1}$ , leading to poor TE performance.<sup>10,11</sup> By combining the flexibility of organic materials and the good TE performance of inorganic materials, hybrid flexible TE generators have been fabricated by depositing the thin film of inorganic semiconductors, such as  $\text{Bi}_2\text{Te}_3$ <sup>12</sup> and  $\text{Ag}_2\text{Se}$ ,<sup>13</sup> atop flexible organic substrates, which could exhibit better TE performance than pure organic conducting polymers. However, the organic substrates induce additional thermal resistance and lower the actual temperature difference across TE materials, which is adverse to the power output of hybrid flexible TE devices.

Recently, an inorganic semiconductor,  $\alpha\text{-Ag}_2\text{S}$ , was found to exhibit an unexpectedly good malleability with a compressive strain above 50% at room temperature, which was thought to be owing to the continuous formation of Ag–S bonds during the slipping process.<sup>14,15</sup> The intrinsically ductile  $\text{Ag}_2\text{S}$  makes it a good

candidate for application in full-inorganic flexible TE devices from the view of machinability and ductility. However, the  $zT$  value of pristine  $\text{Ag}_2\text{S}$  is less than 0.02 at 300 K.<sup>16</sup> A delicate balance between the high TE performance and good ductility of  $\text{Ag}_2\text{S}$ -based materials was achieved in the alloying system, e.g.,  $\text{Ag}_2\text{S}_{0.5}\text{Se}_{0.5}$  and  $\text{Ag}_2\text{S}_{0.7}\text{Te}_{0.3}$ , and the  $zT$  at 300 K was improved to 0.26 and 0.3, respectively, without impairing the plasticity.<sup>17,18</sup> The introduction of Se and/or Te into  $\text{Ag}_2\text{S}$  not only optimizes the carrier concentration but also decreases the phase transition temperature from monoclinic phase to cubic superionic conductor phase with highly disordered  $\text{Ag}^+$  distribution.<sup>19,20</sup>  $\text{Ag}_2\text{S}_{0.7}\text{Te}_{0.3}$  with a body-centered cubic structure shows both the lower Young's modulus and nano hardness compared with monoclinic  $\alpha\text{-Ag}_2\text{S}$ .<sup>18</sup> Density functional theory calculations indicate that the lower generalized stacking fault energy and the larger cleavage energy in cubic  $\text{Ag}_2\text{S}_{0.7}\text{Te}_{0.3}$  are responsible for its good ductility.<sup>18</sup> These results suggest the cubic superionic conductor phase is the origin of good ductility in the S-rich  $\text{Ag}_2\text{Te}_{1-x}\text{S}_x$  ( $x \geq 0.7$ ).

Unexpectedly, in the Te-rich  $\text{Ag}_2\text{Te}_{1-x}\text{S}_x$  materials ( $x = 0.3$  and  $0.4$ ), the amorphization was observed by He et al.<sup>21</sup> Nevertheless, the studied amorphous  $\text{Ag}_2\text{Te}_{0.6}\text{S}_{0.4}$  sample can still exhibit large plastic deformability with a maximum compressive strain up to 25% and tensile strain to 12.5%. The formation and extending of shear bands, which are the primary process accounting for the ductility of bulk metallic glasses,<sup>21,22</sup> were thought to be responsible for the exceptional plastic deformability. Distinct from the ductile  $\text{Ag}_2\text{Te}_{0.6}\text{S}_{0.4}$ , the studied  $\text{Ag}_2\text{Te}_{0.7}\text{S}_{0.3}$  sample, which also exhibits amorphization, was brittle in the compressive test.<sup>21</sup> More recently,  $\text{Ag}_2\text{Te}_{0.5}\text{S}_{0.5}$ , which was thought to exhibit an amorphous/crystalline composite structure, was reported to display larger plastic deformation with a compressive strain of 30%.<sup>23</sup> These results suggest that  $\text{Ag}_2\text{Te}_{1-x}\text{S}_x$  compounds are promising candidates for power generation applications in scenarios with curved surfaces. However, the relationship between plastic deformability and the phase structure, particularly the amorphization, in  $\text{Ag}_2\text{Te}_{1-x}\text{S}_x$  remains elusive. The revelation of this relationship is crucial for promoting both the understanding of the deformation mechanism and the practical applications of ductile inorganic semiconductors.

In this study, the amorphous  $\text{Ag}_2\text{Te}_{1-x}\text{S}_x$  ( $x = 0.3, 0.4,$  and  $0.5$ ) samples were fabricated by directly quenching the molten ingots into cold water and subjecting them to different heat treatment processes to systematically investigate the correlation between phase structure and plastic deformability. Compared with the quenched ingots, the annealed  $\text{Ag}_2\text{Te}_{1-x}\text{S}_x$  specimens with cubic-crystalline/amorphous structure exhibit the coexistence of metal-like malleability, superb ductility, high carrier mobility ( $\sim 1000 \text{ cm}^2 \text{ V}^{-1} \text{ s}^{-1}$  at 300 K), and decent TE performance. All the annealed  $\text{Ag}_2\text{Te}_{1-x}\text{S}_x$  specimens exhibit large compressive strain up to 70% without fractures. Meanwhile, the maximum ductility was found in the  $\text{Ag}_2\text{Te}_{0.7}\text{S}_{0.3}$  sample with a maximum elongation of 107.3% under a relatively low ultimate stress of 46.7 MPa, the highest one yet found in the  $\text{Ag}_2\text{Te}_{1-x}\text{S}_x$  system. These results pave the way for applying ductile and high-mobility  $\text{Ag}_2\text{Te}_{1-x}\text{S}_x$  TE semiconductors in the field of flexible and wearable electronics.

## RESULTS AND DISCUSSION

### Coexistence of superb ductility and carrier mobility

Both higher carrier mobility and mechanical ductility are prerequisites for the implementation of flexible/wearable devices. For TE devices, high carrier mobility can guarantee low power consumption. For flexible electronics, higher carrier mobility can enable a faster switching speed and higher operating frequencies of transistors. Meanwhile, ductility is required to optimize the mechanical behavior and facilitate the manufacture of the devices. Aimed at simultaneously evaluating these two parameters, a modified Ashby plot at ambient temperature is presented in Figure 1A. We define a ductility factor  $d = l/\sigma_u$  to quantitatively

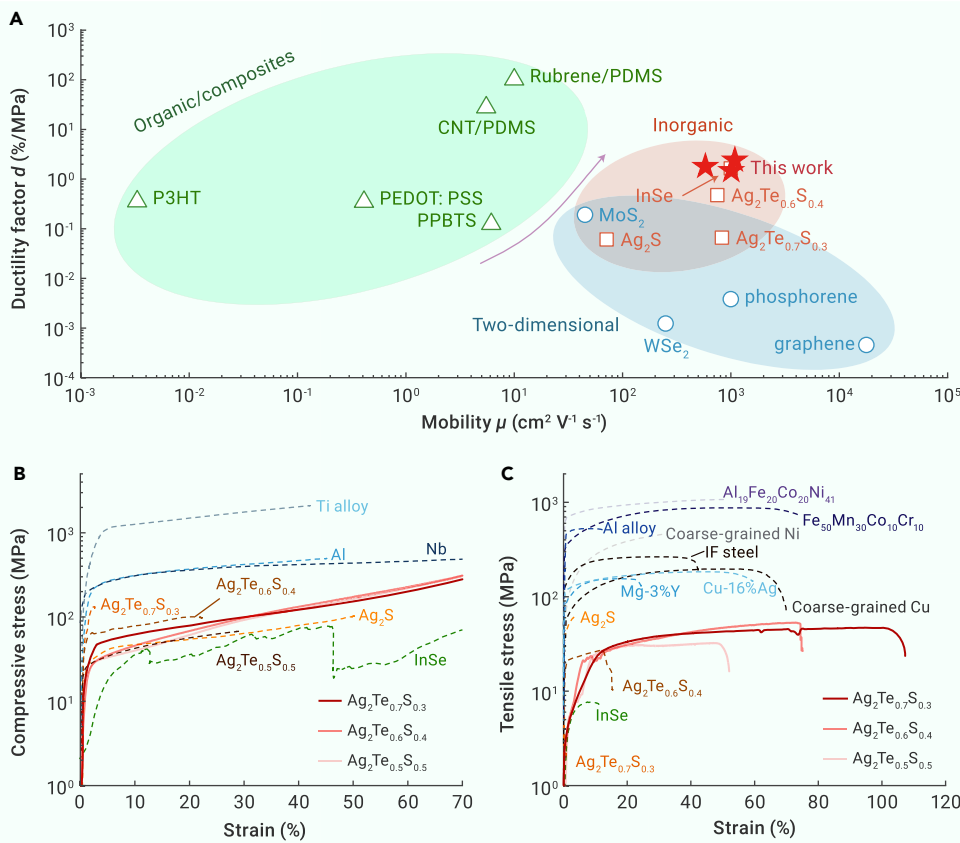

**Figure 1. Superb ductility in high-mobility inorganic semiconductor  $\text{Ag}_2\text{Te}_{1-x}\text{S}_x$  ( $x = 0.3, 0.4, \text{ and } 0.5$ )** (A) Ductility factor  $d$  versus carrier mobility  $\mu$  for the annealed  $\text{Ag}_2\text{Te}_{1-x}\text{S}_x$  specimens and those candidates that could be used in flexible electronics, including organic materials,<sup>24–30</sup> two-dimensional nanomaterials,<sup>31–38</sup> and plastic inorganic semiconductors.<sup>14,21,39,40</sup> Note that the mobility for whole two-dimensional nanomaterials and partial organic films in (A) is field-effect mobility. (B and C) Compressive (B) and tensile (C) tests at room temperature. Reported materials such as plastic inorganic semiconductors,<sup>14,21,23,39</sup> metals, metallic alloys,<sup>41–48</sup> IF steels,<sup>49</sup> and high-entropy alloys<sup>50,51</sup> are shown for comparison.

with conventional engineering alloys, which overcome the strength–ductility trade-off and show not only high strength but also high tensile plasticity.<sup>59,60</sup> As displayed in Figure 1C, the studied  $\text{Ag}_2\text{Te}_{0.7}\text{S}_{0.3}$  and  $\text{Ag}_2\text{Te}_{0.6}\text{S}_{0.4}$  samples show superior ductility to the state-of-the-art high-entropy alloys and exhibit a high uniform tensile elongation of about 100%. By further considering the relatively small tensile stress applied, the studied  $\text{Ag}_2\text{Te}_{0.7}\text{S}_{0.3}$  and  $\text{Ag}_2\text{Te}_{0.6}\text{S}_{0.4}$  samples exhibit excellent machinability for potential wearable/flexible applications on curved surfaces.

### The detrimental role of monoclinic $\text{Ag}_2\text{Te}$ to plasticity

In the first set of our experiments,  $\text{Ag}_2\text{Te}_{1-x}\text{S}_x$  ( $x = 0–0.5$ ) ingots were synthesized by using a water-quench method to facilitate the formation

of more amorphous phases. When  $x \leq 0.2$ , the  $\text{Ag}_2\text{Te}_{1-x}\text{S}_x$  samples crystallize in a monoclinic  $\alpha\text{-Ag}_2\text{Te}$  structure and exhibit brittle fracture in the compressive tests (Figure S1). The compressive and tensile properties of the quenched ingots ( $x \geq 0.3$ ) are displayed in Figures 2 and S2. Unexpectedly, only the  $\text{Ag}_2\text{Te}_{0.7}\text{S}_{0.3}$  sample is plastic, exhibiting a significant strain hardening process and around 27% compressive strain. Conversely, the compressive stress–strain curve of the  $\text{Ag}_2\text{Te}_{0.6}\text{S}_{0.4}$  sample displays linear elastic deformation behavior at the beginning of their stress–strain curves, and then the sample breaks at the maximum compressive strain of 4% without yielding (Figure 2A). This suggests a typical compressive failure of brittle materials, which is much different from the previous reports,<sup>21,23</sup> in which the compressive strain for  $\text{Ag}_2\text{Te}_{0.6}\text{S}_{0.4}$  and  $\text{Ag}_2\text{Te}_{0.5}\text{S}_{0.5}$  samples could reach 20%. These differences make us aware that the various phase structures, relating to the different preparation methods, might have significant impacts on the plastic deformability of  $\text{Ag}_2\text{Te}_{1-x}\text{S}_x$  materials and even result in a brittle-to-plastic variation. However, the factors that cause a considerable difference in the plastic deformability of  $\text{Ag}_2\text{Te}_{1-x}\text{S}_x$  samples with the same nominal composition were previously not studied.

In the second set of our experiments, the quenched ingots were subjected to an annealing process at 723 K for 7 days. The X-ray diffraction (XRD) patterns of bulk  $\text{Ag}_2\text{Te}_{1-x}\text{S}_x$  ( $x = 0.3, 0.4, \text{ and } 0.5$ ) obtained by quenching and annealing are displayed in Figures 2C and S2A. Firstly, it should be noted that the XRD patterns of samples with  $x = 0.3$  and  $x = 0.4$  in Figure 2C are different from those of  $\text{Ag}_2\text{Te}_{0.7}\text{S}_{0.3}$  and  $\text{Ag}_2\text{Te}_{0.6}\text{S}_{0.4}$  reported previously,<sup>21</sup> which contain no sharp diffraction peak in the  $2\theta$  range of  $30^\circ$  to  $50^\circ$  and exhibit an amorphous phase-dominated structure. A small diffraction peak at  $2\theta = 12.5^\circ$  is detected for all quenched samples, corresponding to the diffraction peaks of the monoclinic  $\text{Ag}_2\text{Te}$  (space group  $P2_1/c$ ). Furthermore, the whole differential scanning calorimetry (DSC) curves for the quenched and annealed  $\text{Ag}_2\text{Te}_{1-x}\text{S}_x$  specimens during the heating and cooling process are displayed in Figure S3. The second heating cycle for quenched  $\text{Ag}_2\text{Te}_{1-x}\text{S}_x$  and the first heating cycle for annealed  $\text{Ag}_2\text{Te}_{1-x}\text{S}_x$  are displayed in Figures 2D and S2B for comparison. As can be seen, the DSC curves for quenched  $\text{Ag}_2\text{Te}_{1-x}\text{S}_x$  indicate the phase transition of  $\text{Ag}_2\text{Te}$  at 423 K from the monoclinic phase to the face-centered cubic phase,<sup>61</sup> confirming the existence of monoclinic  $\text{Ag}_2\text{Te}$  in the quenched samples. However, the electron probe microanalysis (EPMA) imaging and energy dispersive

reflect the material's ability to be stretched, where  $l$  is the total elongation at break (%) and  $\sigma_u$  is the ultimate tensile strength (MPa). Specifically, a large ductility factor  $d$  suggests that the materials can exhibit a large elongation at low tensile strength.

As shown in Figure 1A, organic semiconductors such as polydimethylsiloxane<sup>24,25</sup> and poly(3,4-ethylenedioxythiophene) poly(styrene sulfonate),<sup>26,27</sup> which have been widely used in fabricating flexible devices,<sup>52</sup> show the highest ductility factor with the large elongation value at extremely low stress. However, the low carrier mobility of organic semiconductors limits their application to low-frequency flexible electronics.<sup>53–56</sup> The emergence of two-dimensional (2D) nanomaterials, which are demonstrated to exhibit high device mobility (about  $10^4 \text{ cm}^2 \text{V}^{-1} \text{s}^{-1}$  for graphene), promotes the flexible technology transformation from electronics for sensors and display to integrated flexible nanoelectronics.<sup>55,57</sup> The low ductility factor for 2D nanomaterials, as shown in Figure 1A, is mainly due to their high modulus (for instance, 1000 GPa Young's modulus for graphene<sup>57</sup>). Nevertheless, large-scale, reproducible synthesis of 2D nanomaterials has been still difficult to achieve so far.<sup>58</sup> The values of the ductility factor for  $\text{Ag}_2\text{Te}_{1-x}\text{S}_x$  specimens in this work are between organic semiconductors and 2D nanomaterials, sufficient to meet the required mechanical properties for flexible electronics. Besides, the carrier mobility of  $\text{Ag}_2\text{Te}_{0.7}\text{S}_{0.3}$  and  $\text{Ag}_2\text{Te}_{0.6}\text{S}_{0.4}$  around  $1000 \text{ cm}^2 \text{V}^{-1} \text{s}^{-1}$  is comparable to traditional silicon material ( $1400 \text{ cm}^2 \text{V}^{-1} \text{s}^{-1}$  for electrons) and superior to organic semiconductors and ductile binary  $\text{Ag}_2\text{S}$ , which shows significant advantages for applications in the fields of flexible electronics.

Figures 1B and 1C show the mechanical properties of the previously reported plastic inorganic semiconductors, metals, metallic alloys, steels, and high-entropy alloys. The metal-like malleability of cubic-crystalline/amorphous structure  $\text{Ag}_2\text{Te}_{1-x}\text{S}_x$  is displayed in Figure 1B. The compressive strain reaches 70%, which is larger than that of plastic inorganic semiconductors<sup>14,21,23</sup> and comparable to typical metals.<sup>41,42</sup> Furthermore, the ductility for our crystalline/amorphous  $\text{Ag}_2\text{Te}_{1-x}\text{S}_x$  is much higher than that of the previously reported monoclinic  $\text{Ag}_2\text{S}$ , amorphous  $\text{Ag}_2\text{Te}_{0.6}\text{S}_{0.4}$ , and van der Waals layered InSe, of which the elongation values are 4.2%,<sup>14</sup> 12.5%,<sup>21</sup> and 12%<sup>39</sup> respectively. Additionally, the tensile strain above 50% is also comparable to that for coarse-grained metals.<sup>43,44</sup> High-entropy alloys display significantly improved mechanical properties compared

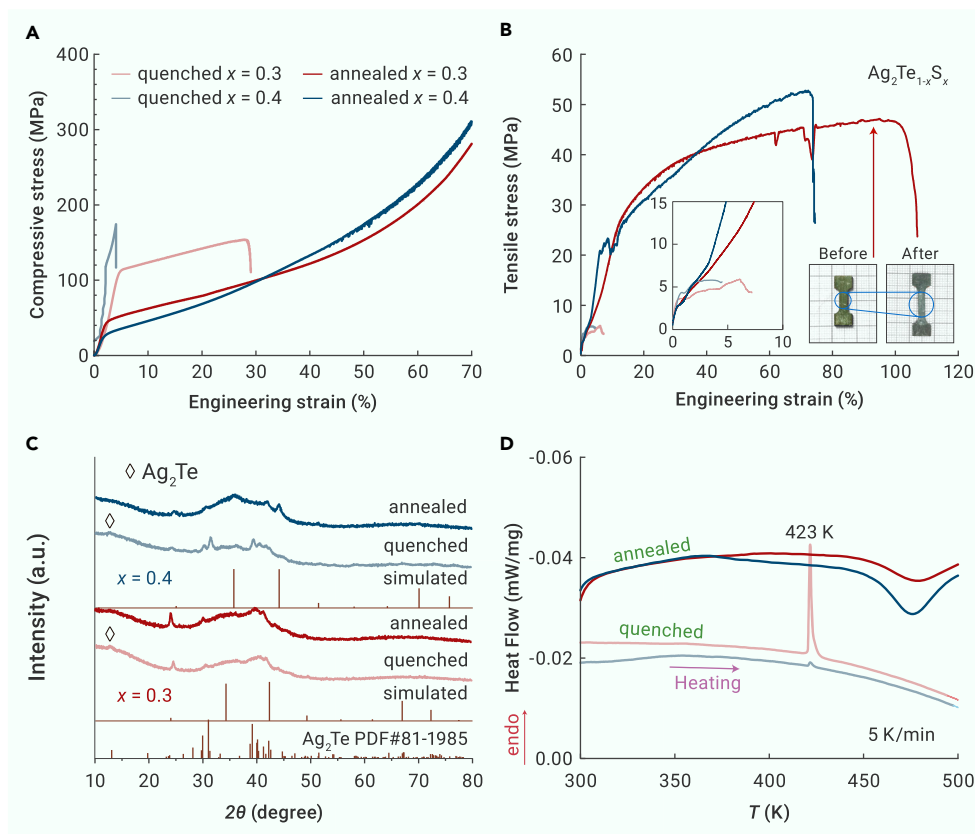

**Figure 2.** Elimination of monoclinic  $\text{Ag}_2\text{Te}$  phase in inorganic semiconductor  $\text{Ag}_2\text{Te}_{1-x}\text{S}_x$  ( $x = 0.3$  and  $0.4$ ) (A and B) Stress–strain diagrams for quenched and annealed  $\text{Ag}_2\text{Te}_{1-x}\text{S}_x$  specimens in the compressive test (A) and the tensile test (B). The inset in (B) shows the outer appearance of the tensile samples before and after the tensile test. (C) Room temperature bulk XRD patterns of the quenched and annealed  $\text{Ag}_2\text{Te}_{1-x}\text{S}_x$  samples. The simulated patterns by VESTA are displayed for comparison. (D) DSC heating curves for quenched and annealed  $\text{Ag}_2\text{Te}_{1-x}\text{S}_x$  samples with a heating rate of 5 K/min. The curve of the quenched  $x = 0.4$  sample has been shifted down along the y axis to avoid overlapping with other measured curves

displayed in Figures 2C and S2A, and the lattice parameters of  $x = 0.3, 0.4,$  and  $0.5$  are set to be 5.224, 5.020, and 5.013 Å for the simulation. The simulated XRD patterns are partly consistent with the experimental results, particularly for the annealed samples, confirming the partial formation of cubic structure in the studied  $\text{Ag}_2\text{Te}_{1-x}\text{S}_x$  ( $x \geq 0.3$ ) samples. Moreover, the signature of partial amorphization of the  $\text{Ag}_2\text{Te}_{1-x}\text{S}_x$  materials ( $x \geq 0.3$ ), that is, a broad hump appearing around  $2\theta = 30^\circ - 50^\circ$ , was verified from the XRD pattern (Figure 2C), similar to previous reports.<sup>21–23,63</sup> Moreover, the submicroscale vein-like dimple patterns with different depths are observed in the fracture surface of the brittle quenched  $x = 0.4$  sample and the ductile annealed  $x = 0.4$  sample (Figures 3A and 3B), showing a typical

fracture morphology of BMGs, which indicates plastic flow on the microscale.<sup>64,65</sup> Accordingly, we think that the main phase of the studied quenched and annealed  $\text{Ag}_2\text{Te}_{1-x}\text{S}_x$  samples is a crystalline/amorphous composite and that the annealed ones exhibit the elimination of monoclinic  $\text{Ag}_2\text{Te}$ . Additionally, Figures 3C–3F show that the EDS mappings performed on the polished surface of annealed  $\text{Ag}_2\text{Te}_{0.6}\text{S}_{0.4}$ , indicating all elements, Ag, Te, and S, are distributed homogeneously.

As shown in Figure 2A, all annealed  $\text{Ag}_2\text{Te}_{1-x}\text{S}_x$  ( $x = 0.3$  and  $0.4$ ) specimens show mechanical characteristics of typical ductile materials in the compressive test. The large-strain deformation under compressive loading reflects the excellent plastic deformability of  $\text{Ag}_2\text{Te}_{1-x}\text{S}_x$  materials. To comprehensively evaluate the mechanical properties of plastic materials, here tensile tests were also performed to determine the ductility.<sup>66,67</sup> Tensile stress–strain curves of the quenched and annealed  $\text{Ag}_2\text{Te}_{1-x}\text{S}_x$  are shown in Figures 2B and S2D, where the tensile plasticity (ductility) has been enhanced in annealed specimens compared with quenched  $\text{Ag}_2\text{Te}_{1-x}\text{S}_x$ . All the annealed specimens exhibit large tensile strain above 50% with significant work hardening, and serrations are found in stress–strain curves for the annealed  $\text{Ag}_2\text{Te}_{0.7}\text{S}_{0.3}$  and  $\text{Ag}_2\text{Te}_{0.6}\text{S}_{0.4}$ , resulting in larger tensile strain. Significantly, the annealed  $\text{Ag}_2\text{Te}_{0.7}\text{S}_{0.3}$  exhibits an extremely good ductility with total elongation of 107.3% under a relatively low ultimate stress of 46.7 MPa (Figure 2B), and the inset presents dog-bone-shaped tensile samples before and after the tensile test, indicating large tensile deformation in the deformation region. The tensile strain can reach 75.1% for annealed  $\text{Ag}_2\text{Te}_{0.6}\text{S}_{0.4}$  in Figure 2B and decreases to  $\sim 51.8\%$  for annealed  $\text{Ag}_2\text{Te}_{0.5}\text{S}_{0.5}$  in Figure S2D.

To examine the reproducibility of the plastic deformability in the  $\text{Ag}_2\text{Te}_{1-x}\text{S}_x$  system, three cuboids and two dog-bone-shaped specimens were cut from various regions of the ingot for both quenched and annealed samples, and the stress–strain curves for compressive and tensile tests are shown in Figure S5. For quenched  $\text{Ag}_2\text{Te}_{0.7}\text{S}_{0.3}$ , the compressive strain values range from 28.1% to 70%. Both brittle fracture and plastic deformation are observed in  $\text{Ag}_2\text{Te}_{0.6}\text{S}_{0.4}$  samples, while all the quenched  $\text{Ag}_2\text{Te}_{0.5}\text{S}_{0.5}$  cuboids exhibit brittle fracture. The inhomogeneity and uncontrollability of plastic deformability can be ascribed to the inhomogeneous distribution of the monoclinic  $\text{Ag}_2\text{Te}$  phase in quenched  $\text{Ag}_2\text{Te}_{1-x}\text{S}_x$  specimens. In contrast, when the quenched  $\text{Ag}_2\text{Te}_{1-x}\text{S}_x$  is subjected to an annealing process at 723 K to eliminate the  $\text{Ag}_2\text{Te}$  phase as discussed above, an enhanced plastic deformation behavior is observed in annealed

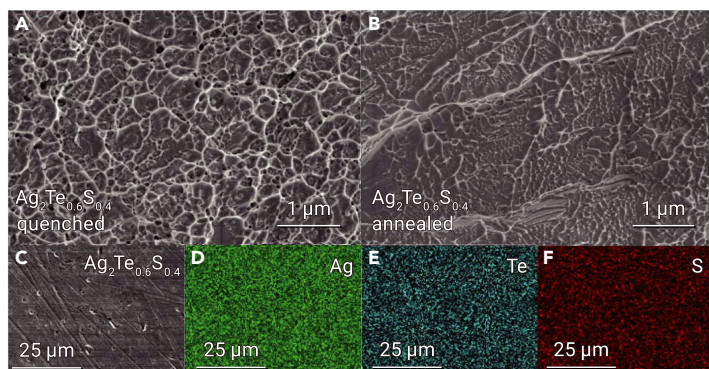

**Figure 3.** Microstructure of quenched and annealed  $\text{Ag}_2\text{Te}_{0.6}\text{S}_{0.4}$  samples (A and B) SEM image of the fracture surface of the quenched  $\text{Ag}_2\text{Te}_{0.6}\text{S}_{0.4}$  (A) and the annealed  $\text{Ag}_2\text{Te}_{0.6}\text{S}_{0.4}$  (B). (C) SEM images of the polished surface of the annealed  $\text{Ag}_2\text{Te}_{0.6}\text{S}_{0.4}$ . (D–F) Ag (D), Te (E), and S (F) elemental distribution in (C).

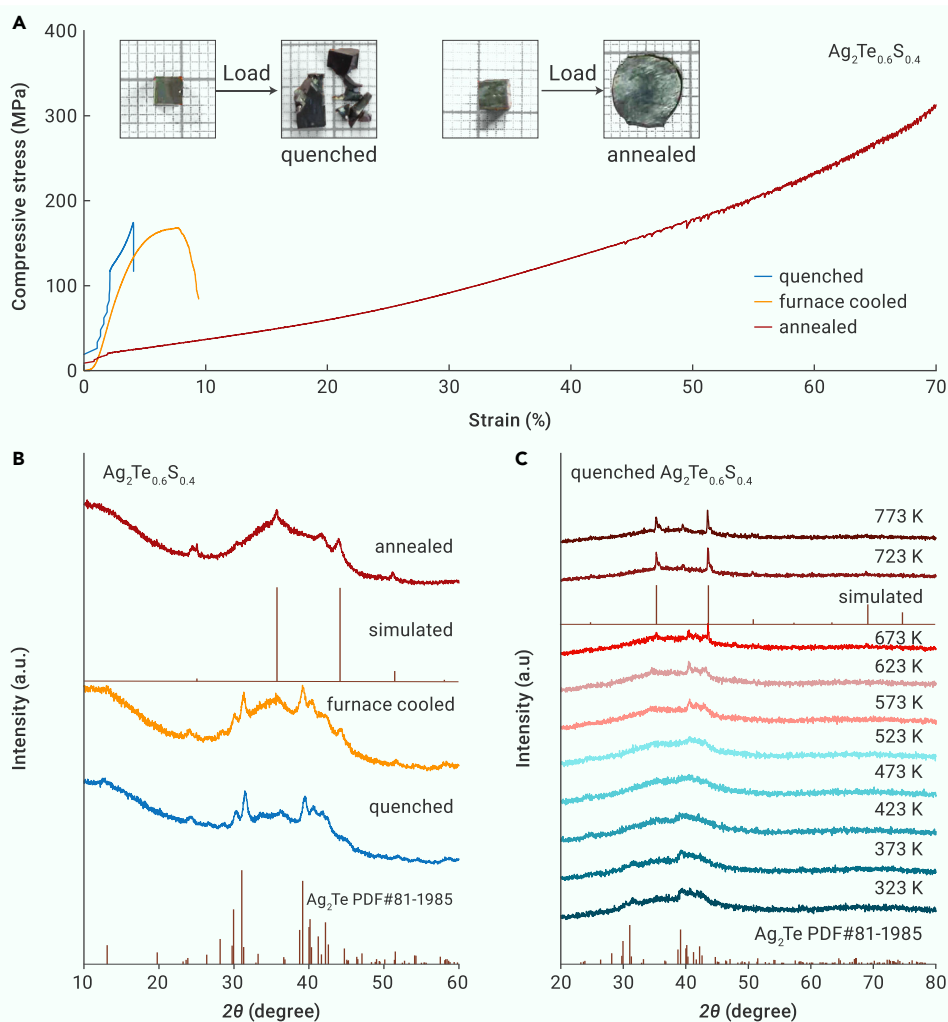

**Figure 4. Enhancement of the plastic deformability in  $\text{Ag}_2\text{Te}_{0.6}\text{S}_{0.4}$**  (A and B) Compressive stress-strain curves (A) and room temperature bulk XRD patterns (B) for  $\text{Ag}_2\text{Te}_{0.6}\text{S}_{0.4}$  obtained by different heat treatment processes. The inset in (A) shows quenched and annealed cuboids before and after the compressive test. (C) Powder XRD patterns of the quenched  $\text{Ag}_2\text{Te}_{0.6}\text{S}_{0.4}$  at different temperatures.

weak deformability in  $\text{Ag}_2\text{Te}_{1-x}\text{S}_x$  materials, and the heat treatment of annealing at 723 K is crucial to achieving good plastic deformability, which promotes the phase transformation into the cubic phase and eliminates the brittle  $\text{Ag}_2\text{Te}$  phase simultaneously. Consequently, excellent plastic deformability can be achieved in  $\text{Ag}_2\text{Te}_{1-x}\text{S}_x$  samples with the coexistence of cubic-crystalline and amorphous phases.

### TE properties

The Hall carrier mobility  $\mu_H$  of quenched and annealed  $\text{Ag}_2\text{Te}_{1-x}\text{S}_x$  ( $x = 0.3$  and  $0.4$ ) is shown in Figure 5A. The  $\mu_H$  for annealed  $\text{Ag}_2\text{Te}_{0.7}\text{S}_{0.3}$  and  $\text{Ag}_2\text{Te}_{0.6}\text{S}_{0.4}$  reaches above  $1000 \text{ cm}^2 \text{ V}^{-1} \text{ s}^{-1}$  at ambient temperature, which is about 40% higher than the quenched samples as well as the previously reported ones.<sup>21</sup> The Seebeck coefficient  $S$  and the electrical conductivity  $\sigma$  for quenched and annealed  $\text{Ag}_2\text{Te}_{1-x}\text{S}_x$  ( $x = 0.3, 0.4$ , and  $0.5$ ) under a temperature range of 300 to 575 K are shown in Figures 5B, 5C, S6A, and S6B. All specimens display a typical conducting behavior of a degenerate semiconductor without the occurrence of intrinsic excitation. The  $\sigma$  follows a  $T^{-1.3} \sim T^{-1.5}$  dependency, implying that the acoustic phonon scattering dominates the charge transport. Notably, good electrical performance can be maintained in annealed specimens

$\text{Ag}_2\text{Te}_{1-x}\text{S}_x$  specimens, and, more importantly, the reproducibility of ductility for different pieces is pretty good. Distinctly, all annealed  $\text{Ag}_2\text{Te}_{1-x}\text{S}_x$  specimens show mechanical characteristics of typical ductile materials in both the compressive and tensile tests. A large tensile strain above 50% is observed in all annealed  $\text{Ag}_2\text{Te}_{1-x}\text{S}_x$  ( $x = 0.3, 0.4$ , and  $0.5$ ) specimens, which is larger than that in the previous reports (a tensile strain of around 12.5% in  $\text{Ag}_2\text{Te}_{0.6}\text{S}_{0.4}$ <sup>21</sup>), suggesting the importance of the elimination of monoclinic  $\text{Ag}_2\text{Te}$  to obtain superb ductility.

As discussed above, the plastic deformability of  $\text{Ag}_2\text{Te}_{1-x}\text{S}_x$  materials is significantly affected by the heat treatment process. To further explore the effect of the heat treatment on the mechanical properties,  $\text{Ag}_2\text{Te}_{0.6}\text{S}_{0.4}$  samples were melted at 1273 K and then followed by different heat treatments to obtain the final ingots: water quenching, furnace cooling, and annealing (annealing at 723 K within 7 days). Figure 4A displays the compressive property for  $\text{Ag}_2\text{Te}_{0.6}\text{S}_{0.4}$  ingots with different heat treatments. The quenched and furnace-cooled  $\text{Ag}_2\text{Te}_{0.6}\text{S}_{0.4}$  samples, of which the XRD patterns in Figure 4B suggest the existence of the monoclinic  $\text{Ag}_2\text{Te}$  phase, exhibit relatively weak deformability with a compressive strain smaller than 10% (Figure 4A). In contrast, the compressive strain–stress curves for annealed  $\text{Ag}_2\text{Te}_{0.6}\text{S}_{0.4}$  indicates a superior plastic deformation with a compressive strain up to 70%. The quenched and annealed specimens before and after compressive loading are shown in the inset of Figure 4A, and the quenched cuboid broke directly at the maximum load while the annealed cuboid can be eventually pressed into a plate without fracture. Moreover, the variable temperature XRD measurement for the quenched  $\text{Ag}_2\text{Te}_{0.6}\text{S}_{0.4}$  is shown in Figure 4C. Three XRD reflections, appearing around  $2\theta$  of  $40^\circ$ – $45^\circ$ , can be indexed to the monoclinic  $\text{Ag}_2\text{Te}$  phase in a temperature range from 323 to 673 K. Above 723 K, the monoclinic structure disappears while the cubic structure appears. This is also the reason why the annealed temperature of the quenched sample was determined to be 723 K to eliminate the monoclinic  $\text{Ag}_2\text{Te}$  phase. To conclude, the existence of the monoclinic  $\text{Ag}_2\text{Te}$  phase is responsible for the

mechanical properties of  $\text{Ag}_2\text{Te}_{0.6}\text{S}_{0.4}$  and  $\text{Ag}_2\text{Te}_{0.5}\text{S}_{0.5}$  while enhancing the material's ductility. As shown in Figure 5D, the PF values at 300 K are slightly reduced from  $0.61 \times 10^{-3} \text{ W m}^{-1} \text{ K}^{-2}$  for quenched  $\text{Ag}_2\text{Te}_{0.7}\text{S}_{0.3}$  to  $0.50 \times 10^{-3} \text{ W m}^{-1} \text{ K}^{-2}$  for annealed  $\text{Ag}_2\text{Te}_{0.7}\text{S}_{0.3}$  and have no change in the quenched and annealed samples for  $\text{Ag}_2\text{Te}_{0.6}\text{S}_{0.4}$ , which are also comparable to the data reported.<sup>21</sup> The electrical transport properties of  $\text{Ag}_2\text{Te}_{1-x}\text{S}_x$  were analyzed by a single parabolic band (SPB) model (Note S1). In  $\text{Ag}_2\text{Te}_{1-x}\text{S}_x$  materials, the density of states' effective mass  $m^*$  at 300 K, estimated by the theoretical Pisarenko curves presented in Figure S6C, gradually increases with the increasing S content, from  $m^* = 0.12 m_e$  (where  $m_e$  is the free electron mass) for  $\text{Ag}_2\text{Te}_{0.7}\text{S}_{0.3}$  to  $m^* = 0.20 m_e$  for  $\text{Ag}_2\text{Te}_{0.3}\text{S}_{0.7}$ ,<sup>18</sup> implying that alloying S at Te sites might alter the shape of the conduction band minimum and yield to a larger  $m^*$ . This could explain why the annealed  $\text{Ag}_2\text{Te}_{0.5}\text{S}_{0.5}$  sample has a relatively low carrier mobility  $\mu_H$  of  $580 \text{ cm}^2 \text{ V}^{-1} \text{ s}^{-1}$  compared with other ductile annealed specimens. Based on the SPB model, the calculated PF as a function of carrier concentration  $n_H$  is presented in Figure S6D, indicating that the electrical performance of  $\text{Ag}_2\text{Te}_{1-x}\text{S}_x$  can be further enhanced by decreasing  $n_H$ .

Figures 5E and S6E show the temperature dependence of the total thermal conductivity  $\kappa$  for all the  $\text{Ag}_2\text{Te}_{1-x}\text{S}_x$  ( $x = 0.3, 0.4$ , and  $0.5$ ) samples. The  $\kappa$  values are in the range of  $0.4$  to  $0.8 \text{ W m}^{-1} \text{ K}^{-1}$  and are independent of the temperature, which shows a typical thermal transport property of superionic conductors and amorphous solids as previously reported.<sup>68–70</sup> The elimination of the  $\text{Ag}_2\text{Te}$  phase in annealed specimens does not significantly affect the  $\kappa$  compared with the quenched one. The lattice thermal conductivity  $\kappa_L$  can be calculated by  $\kappa = \kappa_L + \kappa_e$ , in which the electronic thermal conductivity  $\kappa_e$  is evaluated via the Wiedemann–Franz law  $\kappa_e = L\sigma T$ , where the Lorenz number  $L$  can be estimated according to the measured Seebeck coefficient using the SPB model. But it turns out that the values of  $\kappa_L$  for most of the quenched and annealed  $\text{Ag}_2\text{Te}_{1-x}\text{S}_x$  samples are even negative near room temperature. This was also reported in other

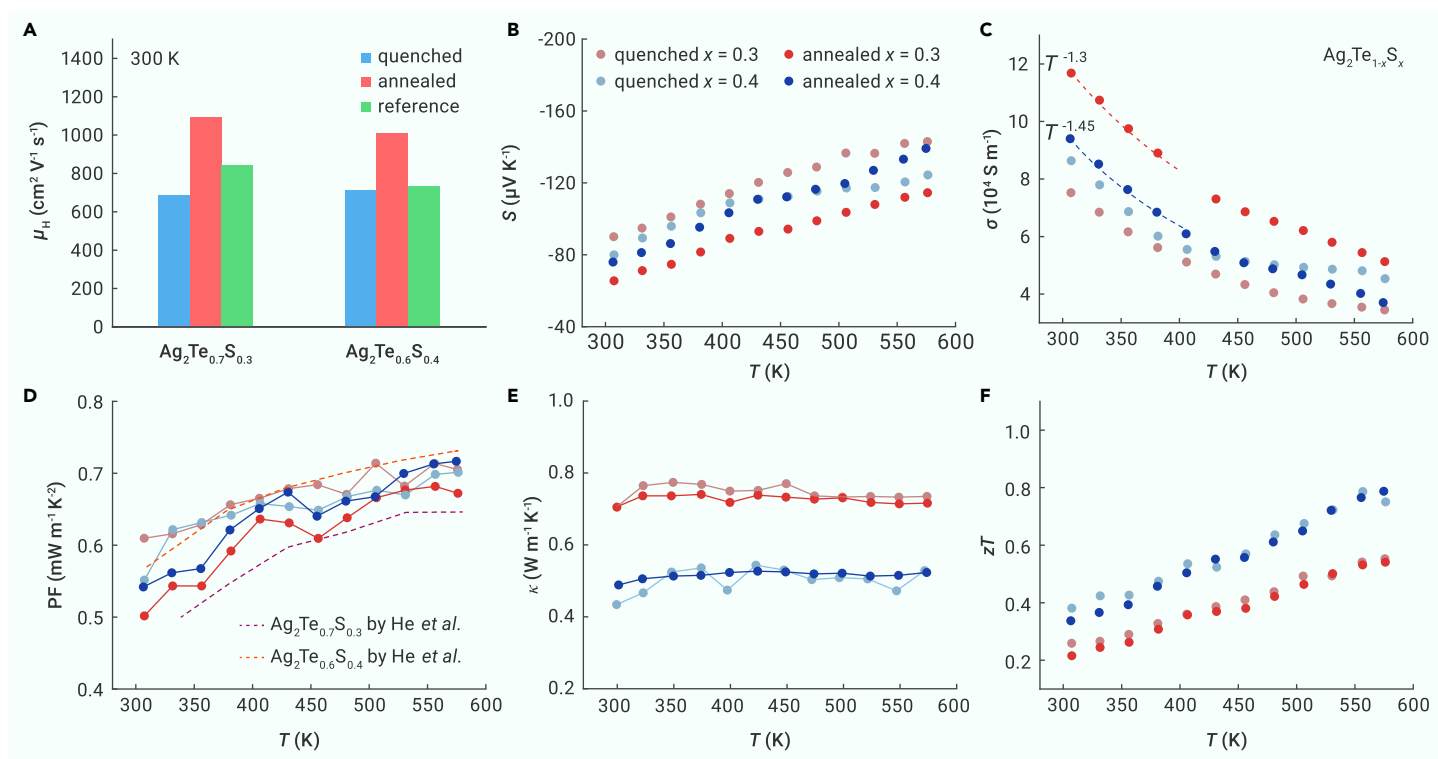

**Figure 5.** Temperature dependences of thermoelectric properties for  $\text{Ag}_2\text{Te}_{1-x}\text{S}_x$  ( $x = 0.3$  and  $0.4$ ) (A) Room temperature carrier mobility  $\mu_H$  for quenched and annealed  $\text{Ag}_2\text{Te}_{1-x}\text{S}_x$  specimens, and the reference data are presented for comparison.<sup>21</sup> (B–F) Temperature dependence of (B) Seebeck coefficient  $S$ , (C) electrical conductivity  $\sigma$ , (D) power factor, (E) total thermal conductivity  $\kappa$ , and (F)  $zT$  values for quenched and annealed  $\text{Ag}_2\text{Te}_{1-x}\text{S}_x$  ( $x = 0.3$  and  $0.4$ ) specimens.

typical superionic conductors, such as  $\text{Cu}_2\text{Te}$ -based<sup>71</sup> and  $\text{Ag}_2\text{Te}$ -based<sup>72</sup> materials. The unphysical determination of  $\kappa_L$  can be ascribed to the overestimation of  $\kappa_e$  using the Wiedemann–Franz law in the superionic conductor phase since the mobile cations may also contribute to the electrical conductivity. The accurate determination of  $\kappa_L$  in  $\text{Ag}_2\text{Te}_{1-x}\text{S}_x$  materials with migrating  $\text{Ag}^+$  needs further investigation in future studies.

The dimensionless figure of merit  $zT$  of all quenched and annealed  $\text{Ag}_2\text{Te}_{1-x}\text{S}_x$  ( $x = 0.3, 0.4$ , and  $0.5$ ) is presented in Figures 5F and S6F. Finally, the annealed  $\text{Ag}_2\text{Te}_{0.6}\text{S}_{0.4}$  exhibits the highest  $zT$  in the range of 300 to 573 K, and a  $zT$  of about 0.3 at 300 K and a maximum  $zT$  of  $\sim 0.8$  at 573 K were obtained. It is worth noting that the temperature-dependent  $zT$  does not differ significantly for the quenched and annealed  $\text{Ag}_2\text{Te}_{1-x}\text{S}_x$  samples. This value is comparable to other ductile TE materials at room temperature, in which  $zT$  values of 0.26 for  $\text{Ag}_2\text{S}_{0.5}\text{Se}_{0.5}$ ,<sup>17</sup> 0.20 for  $\text{Ag}_2\text{Te}_{0.6}\text{S}_{0.4}$ <sup>21</sup> and 0.30 for  $\text{Ag}_2\text{S}_{0.7}\text{Te}_{0.3}$  were achieved.<sup>18</sup> At 573 K, this value is also comparable with that of the brittle  $n$ -type commercial  $\text{Bi}_2\text{Te}_{2.7}\text{Se}_{0.3}$  TE materials,<sup>73</sup> suggesting the potential of  $\text{Ag}_2\text{Te}_{1-x}\text{S}_x$  for TE applications. In addition, the room temperature electrical properties of the annealed  $\text{Ag}_2\text{Te}_{0.6}\text{S}_{0.4}$  sample remain unchanged (Figure S7), while the  $\kappa_L$  increases after the compressive deformation. This anomalous trend suggests that the plastic deformation mechanism of  $\text{Ag}_2\text{Te}_{1-x}\text{S}_x$  materials is independent of the movement of dislocations, as reported in plastic  $\alpha\text{-Ag}_2\text{S}$ .<sup>74</sup>

## Conclusions

We have systematically investigated the processing–microstructure–property relationship of  $\text{Ag}_2\text{Te}_{1-x}\text{S}_x$  plastic inorganic semiconductors. It was found that the precipitation of the monoclinic  $\text{Ag}_2\text{Te}$  phase is the major cause of the brittleness in the  $\text{Ag}_2\text{Te}_{1-x}\text{S}_x$  materials. Through long-term annealing at an appropriate temperature to eliminate the monoclinic  $\text{Ag}_2\text{Te}$  phase, a large compressive strain of 70% and an excellent tensile elongation of 107.3% at room temperature are achieved in the cubic-crystalline/amorphous  $\text{Ag}_2\text{Te}_{1-x}\text{S}_x$  composites. Meanwhile, a high carrier mobility of  $1000 \text{ cm}^2 \text{ V}^{-1} \text{ s}^{-1}$  is also achieved at room temperature for the annealed  $\text{Ag}_2\text{Te}_{1-x}\text{S}_x$  ( $x = 0.3$  and  $0.4$ ) samples, which is 40% higher than that of the quenched ones. Moreover, the TE performance of  $\text{Ag}_2\text{Te}_{1-x}\text{S}_x$  is not impaired by the elimination of the monoclinic  $\text{Ag}_2\text{Te}$  phase. Consequently, a room temperature  $zT$  of 0.3 and a maximum  $zT$  of 0.8 at 573 K are achieved in annealed  $\text{Ag}_2\text{Te}_{0.6}\text{S}_{0.4}$ . This study demonstrates that high-mobility  $\text{Ag}_2\text{Te}_{1-x}\text{S}_x$

TE semiconductors with cubic-crystalline/amorphous structures can exhibit superb plasticity and thus have great potential in the field of flexible/wearable electronics.

## MATERIAL AND METHODS

See the supplemental information for details.

## REFERENCES

- Haras, M., and Skotnicki, T. (2018). Thermoelectricity for IoT – a review. *Nano Energy* **54**, 461–476.
- Patel, S., Park, H., Bonato, P., et al. (2012). A review of wearable sensors and systems with application in rehabilitation. *J. NeuroEng. Rehabil.* **9**, 21.
- Shi, X.L., Zou, J., and Chen, Z.G. (2020). Advanced thermoelectric design: from materials and structures to devices. *Chem. Rev.* **120**, 7399–7515.
- Sun, P., Kumar, K.R., Lyu, M., et al. (2021). Generic Seebeck effect from spin entropy. *Innovation* **2**, 100101.
- Nozariasmbarz, A., Collins, H., Dsouza, K., et al. (2020). Review of wearable thermoelectric energy harvesting: from body temperature to electronic systems. *Appl. Energy* **258**, 114069.
- Zhu, T., Liu, Y., Fu, C., et al. (2017). Compromise and synergy in high-efficiency thermoelectric materials. *Adv. Mater.* **29**, 1605884.
- Li, G., An, Q., Duan, B., et al. (2021). Fracture toughness of thermoelectric materials. *Mater. Sci. Eng. R Rep.* **144**, 100607.
- Fan, Z., Zhang, Y., Pan, L., et al. (2021). Recent developments in flexible thermoelectrics: from materials to devices. *Renew. Sustain. Energy Rev.* **137**, 110448.
- Bahk, J.H., Fang, H., Yazawa, K., et al. (2015). Flexible thermoelectric materials and device optimization for wearable energy harvesting. *J. Mater. Chem. C* **3**, 10362–10374.
- Zhang, Q., Sun, Y., Xu, W., et al. (2014). Organic thermoelectric materials: emerging green energy materials. *Adv. Mater.* **26**, 6829–6851.
- Russ, B., Glaudell, A., Urban, J.J., et al. (2016). Organic thermoelectric materials for energy harvesting and temperature control. *Nat. Rev. Mater.* **1**, 16050.
- Kim, S.J., We, J.H., and Cho, B.J. (2014). A wearable thermoelectric generator fabricated on a glass fabric. *Energy Environ. Sci.* **7**, 1959–1965.
- Ding, Y., Qiu, Y., Cai, K., et al. (2019). High performance  $n$ -type  $\text{Ag}_2\text{Se}$  film on nylon membrane for flexible thermoelectric power generator. *Nat. Commun.* **10**, 841.
- Shi, X., Chen, H., Hao, F., et al. (2018). Room-temperature ductile inorganic semiconductor. *Nat. Mater.* **17**, 421–426.
- Chen, H., Wei, T., Zhao, K., et al. (2021). Room-temperature plastic inorganic semiconductors for flexible and deformable electronics. *InfoMat* **3**, 22–35.

16. Wang, T., Chen, H.Y., Qiu, P.F., et al. (2019). Thermoelectric properties of Ag<sub>2</sub>S superionic conductor with intrinsically low lattice thermal conductivity. *Acta Phys. Sin.* **68**, 090201.
17. Liang, J., Wang, T., Qiu, P., et al. (2019). Flexible thermoelectrics: from silver chalcogenides to full-inorganic devices. *Energy Environ. Sci.* **12**, 2983–2990.
18. Yang, S., Gao, Z., Qiu, P., et al. (2021). Ductile Ag<sub>20</sub>S<sub>7</sub>Te<sub>3</sub> with excellent shape-Conformability and high thermoelectric performance. *Adv. Mater.* **33**, 2007681.
19. Blanton, T., Mixture, S., Dontula, N., et al. (2011). In situ high-temperature X-ray diffraction characterization of silver sulfide, Ag<sub>2</sub>S. *Powder Diffr.* **26**, 114–118.
20. Peng, L., Yang, S., Wei, T.-R., et al. (2021). Phase-modulated mechanical and thermoelectric properties of Ag<sub>2</sub>S<sub>1-x</sub>Te<sub>x</sub> ductile semiconductors. *Journal of Materiomics* **8**, 656–661.
21. He, S., Li, Y., Liu, L., et al. (2020). Semiconductor glass with superior flexibility and high room temperature thermoelectric performance. *Sci. Adv.* **6**, eaaz8423.
22. Liu, Y.H., Wang, G., Wang, R.J., et al. (2007). Super plastic bulk metallic glasses at room temperature. *Science* **315**, 1385–1388.
23. Liang, X., and Chen, C. (2021). Ductile inorganic amorphous/crystalline composite Ag<sub>4</sub>TeS with phonon-glass electron-crystal transport behavior and excellent stability of high thermoelectric performance on plastic deformation. *Acta Mater.* **218**, 117231.
24. Daniai, N.S., Ramli, M.M., Halin, D.S.C., et al. (2017). Incorporation of Polydimethylsiloxane with reduced graphene oxide and zinc oxide for tensile and electrical properties. In Conference on Green Construction and Engineering Education (GCEE).
25. Micolich, A.P., Bell, L.L., and Hamilton, A.R. (2007). An improved process for fabricating high-mobility organic molecular crystal field-effect transistors. *J. Appl. Phys.* **102**, 084511.
26. Lang, U., Naujoks, N., and Dual, J. (2009). Mechanical characterization of PEDOT:PSS thin films. *Synth. Met.* **159**, 473–479.
27. Liu, C., Lu, B., Yan, J., et al. (2010). Highly conducting free-standing poly(3,4-ethylenedioxythiophene)/poly(styrenesulfonate) films with improved thermoelectric performances. *Synth. Met.* **160**, 2481–2485.
28. Kim, H.J., Lee, M.Y., Kim, J.S., et al. (2017). Solution-assembled blends of regioregularity-Controlled Polythiophenes for coexistence of mechanical resilience and electronic performance. *ACS Appl. Mater. Interfaces* **9**, 14120–14128.
29. Kang, Y.H., Bae, E.J., Lee, M.H., et al. (2022). Highly flexible and durable thermoelectric power generator using CNT/PDMS foam by rapid solvent evaporation. *Small* **18**, 2106108.
30. Zhang, T., Li, K., Li, C., et al. (2017). Mechanically durable and flexible thermoelectric films from PEDOT:PSS/PVA/Bi<sub>0.5</sub>Sb<sub>1.5</sub>Te<sub>3</sub> nanocomposites. *Adv. Electron. Mater.* **3**, 1600554.
31. Lee, G.H., Yu, Y.J., Cui, X., et al. (2013). Flexible and transparent MoS<sub>2</sub> field-effect transistors on hexagonal boron nitride-graphene heterostructures. *ACS Nano* **7**, 7931–7936.
32. Li, P., Jiang, C., Xu, S., et al. (2017). In situ nanomechanical characterization of multi-layer MoS<sub>2</sub> membranes: from intraplanar to inter-planar fracture. *Nanoscale* **9**, 9119–9128.
33. Fang, H., Chuang, S., Chang, T.C., et al. (2012). High-performance single layered WSe<sub>2</sub>/p-FETs with Chemically doped Contacts. *Nano Lett.* **12**, 3788–3792.
34. Li, J., Medhekar, N.V., and Shenoy, V.B. (2013). Bonding charge density and ultimate strength of monolayer transition metal Dichalcogenides. *J. Phys. Chem. C* **117**, 15842–15848.
35. Li, L., Yu, Y., Ye, G.J., et al. (2014). Black phosphorus field-effect transistors. *Nat. Nanotechnol.* **9**, 372–377.
36. Wei, Q., and Peng, X. (2014). Superior mechanical flexibility of phosphorene and few-layer black phosphorus. *Appl. Phys. Lett.* **104**, 251915.
37. Tao, L., Lee, J., Li, H., et al. (2013). Inductively heated synthesized graphene with record transistor mobility on oxidized silicon substrates at room temperature. *Appl. Phys. Lett.* **103**, 183115.
38. Yu, M.F., Lourie, O., Dyer, M.J., et al. (2000). Strength and breaking mechanism of multiwalled carbon nanotubes under tensile load. *Science* **287**, 637–640.
39. Wei, T.R., Jin, M., Wang, Y., et al. (2020). Exceptional plasticity in the bulk single-crystalline van der Waals semiconductor InSe. *Science* **369**, 542–545.
40. Bandurin, D.A., Tyurnina, A.V., Yu, G.L., et al. (2017). High electron mobility, quantum Hall effect and anomalous optical response in atomically thin InSe. *Nat. Nanotechnol.* **12**, 223–227.
41. Rashad, M., Pan, F., Tang, A., et al. (2014). Effect of Graphene Nanoplatelets addition on mechanical properties of pure aluminum using a semi-powder method. *Prog. Nat. Sci.: Mater. Int.* **24**, 101–108.
42. Lovato, M.L., and Stout, M.G. (1992). Compression testing techniques to determine the stress-strain behavior of metals subject to finite deformation. *Metall. Trans. A* **23**, 935–951.
43. Wang, Y., Chen, M., Zhou, F., et al. (2002). High tensile ductility in a nanostructured metal. *Nature* **419**, 912–915.
44. Ma, E., and Zhu, T. (2017). Towards strength-ductility synergy through the design of heterogeneous nanostructures in metals. *Mater. Today* **20**, 323–331.
45. Zhang, L., and Chen, L. (2019). A review on biomedical titanium alloys: recent progress and prospect. *Adv. Eng. Mater.* **21**, 1801215.
46. Liddicoat, P.V., Liao, X.Z., Zhao, Y., et al. (2010). Nanostructural hierarchy increases the strength of aluminium alloys. *Nat. Commun.* **1**, 63.
47. Wu, Z., Ahmad, R., Yin, B., et al. (2018). Mechanistic origin and prediction of enhanced ductility in magnesium alloys. *Science* **359**, 447–452.
48. Tian, Y.Z., and Zhang, Z.F. (2009). Microstructures and tensile deformation behavior of Cu-16 wt.% Ag binary alloy. *Mater. Sci. Eng.* **508**, 209–213.
49. Weng, Y., Han, D., and Yong, G. (2011). Advanced Steels: The Recent Scenario in Steel Science and Technology (China: Springer Science & Business Media).
50. Shi, P., Li, R., Li, Y., et al. (2021). Hierarchical crack buffering triples ductility in eutectic herringbone high-entropy alloys. *Science* **373**, 912–918.
51. Li, Z., Pradeep, K.G., Deng, Y., et al. (2016). Metastable high-entropy dual-phase alloys overcome the strength-ductility trade-off. *Nature* **534**, 227–230.
52. Zou, M., Ma, Y., Yuan, X., et al. (2018). Flexible devices: from materials, architectures to applications. *J. Semicond.* **39**, 011010.
53. Hu, P., He, X., and Jiang, H. (2021). Greater than 10 cm<sup>2</sup> V<sup>-1</sup> s<sup>-1</sup>: a breakthrough of organic semiconductors for field-effect transistors. *InfoMat* **3**, 613–630.
54. Nathan, A., Ahnood, A., Cole, M.T., et al. (2012). Flexible electronics: the next ubiquitous platform. *Proc. IEEE* **100**, 1486–1517.
55. Gao, L. (2017). Flexible device applications of 2D semiconductors. *Small* **13**, 1603994.
56. Guo, C.F., and Ding, L. (2021). Integration of soft electronics and biotissues. *Innovation* **2**, 100074.
57. Akinwande, D., Petrone, N., and Hone, J. (2014). Two-dimensional flexible nanoelectronics. *Nat. Commun.* **5**, 5678.
58. Chang, C., Chen, W., Chen, Y., et al. (2021). Recent progress on two-dimensional materials. *Acta Phys.-Chim. Sin.* **37**, 2108017.
59. George, E.P., Curtin, W.A., and Tسان, C.C. (2020). High entropy alloys: a focused review of mechanical properties and deformation mechanisms. *Acta Mater.* **188**, 435–474.
60. Ye, Y.F., Wang, Q., Lu, J., et al. (2016). High-entropy alloy: challenges and prospects. *Mater. Today* **19**, 349–362.
61. Hu, H., Xia, K., Wang, Y., et al. (2021). Fast synthesis and improved electrical stability in n-type Ag<sub>2</sub>Te thermoelectric materials. *J. Mater. Sci. Technol.* **91**, 241–250.
62. Momma, K., and Izumi, F. (2011). VESTA 3 for three-dimensional visualization of crystal, volumetric and morphology data. *J. Appl. Crystallogr.* **44**, 1272–1276.
63. Demetriou, M.D., Launey, M.E., Garrett, G., et al. (2011). A damage-tolerant glass. *Nat. Mater.* **10**, 123–128.
64. Xi, X.K., Zhao, D.Q., Pan, M.X., et al. (2005). Fracture of brittle metallic glasses: brittleness or plasticity. *Phys. Rev. Lett.* **94**, 125510.
65. Sun, B.A., and Wang, W.H. (2015). The fracture of bulk metallic glasses. *Prog. Mater. Sci.* **74**, 211–307.
66. Barry, J., and Goodno, J.M.G. (2018). *Mechanics of Materials*, 9 edn. (Cengage Learning).
67. Zhu, Y.T., and Wu, X.L. (2018). Ductility and plasticity of nanostructured metals: differences and issues. *Mater. Today Nano* **2**, 15–20.
68. Zhao, K., Eikeland, E., He, D., et al. (2021). Thermoelectric materials with crystal-amorphicity duality induced by large atomic size mismatch. *Joule* **5**, 1183–1195.
69. Wang, T., Zhao, K., Qiu, P., et al. (2019). Aguilrite Ag<sub>4</sub>Se thermoelectric material: natural mineral with low lattice thermal conductivity. *ACS Appl. Mater. Interfaces* **11**, 12632–12638.
70. Xiao, C., Xu, J., Li, K., et al. (2012). Superionic phase transition in silver chalcogenide nanocrystals realizing optimized thermoelectric performance. *J. Am. Chem. Soc.* **134**, 4287–4293.
71. Qiu, Y., Liu, Y., Ye, J., et al. (2018). Synergistic optimization of carrier transport and thermal conductivity in Sn-doped Cu<sub>2</sub>Te. *J. Mater. Chem.* **6**, 18928–18937.
72. Wu, R., Li, Z., Li, Y., et al. (2019). Synergistic optimization of thermoelectric performance in p-type Ag<sub>2</sub>Te through Cu substitution. *Journal of Materiomics* **5**, 489–495.
73. Zhang, Q., Lin, Y., Lin, N., et al. (2022). Enhancing the room temperature thermoelectric performance of n-type Bismuth-telluride-based polycrystalline materials by low-angle grain boundaries. *Mater. Today Phys.* **22**, 100573.
74. Liang, X., Chen, C., and Dai, F. (2020). Effect of plastic deformation on phonon thermal conductivity of α-Ag<sub>2</sub>S. *Appl. Phys. Lett.* **117**, 253901.

## ACKNOWLEDGMENTS

The authors acknowledge fruitful discussions with Prof. Yanhui Liu from the Institute of Physics, CAS. This work was supported by the National Science Fund for Distinguished Young Scholars (no. 51725102), the National Natural Science Foundation of China (nos. 92163203 and 52101275), the Key Research and Development Program of Zhejiang Province (2022C01131 and 2021C01026), and Zhejiang Provincial Natural Science Foundation of China (no. LD22E020005).

## AUTHOR CONTRIBUTIONS

H.H., C.F., and T.Z. designed the project. H.H. prepared the samples, characterized structures, and conducted the physical and mechanical properties measurements. Y.W. performed the XRD characterization and provided discussions. H.H. and C.F. analyzed the data and wrote the original manuscript. T.Z. proposed valuable advice for revising the manuscript. T.Z. and X.Z. supervised the research work. All the authors reviewed and edited the manuscript.

## DECLARATION OF INTERESTS

The authors declare no competing interests.

## SUPPLEMENTAL INFORMATION

Supplemental information can be found online at <https://doi.org/10.1016/j.xinn.2022.100341>.

## LEAD CONTACT WEBSITE

C. Fu: [https://person.zju.edu.cn/chenguang\\_fu](https://person.zju.edu.cn/chenguang_fu)  
T. Zhu: <https://person.zju.edu.cn/msezhutj>

**The Innovation, Volume 3**

**Supplemental Information**

**Achieving metal-like malleability and ductility in  $\text{Ag}_2\text{Te}_{1-x}\text{S}_x$  inorganic thermoelectric semiconductors with high mobility**

**Huiping Hu, Yuechu Wang, Chenguang Fu, Xinbing Zhao, and Tiejun Zhu**



1 **Supplemental Information**

2 **Achieving metal-like malleability and ductility in  $\text{Ag}_2\text{Te}_{1-x}\text{S}_x$  inorganic**  
3 **thermoelectric semiconductors with high mobility**

4 Huiping Hu,<sup>1</sup> Yuechu Wang,<sup>1</sup> Chenguang Fu,<sup>1,\*</sup> Xinbing Zhao,<sup>1</sup> and Tiejun Zhu<sup>1,\*</sup>

5 <sup>1</sup>*State Key Laboratory of Silicon Materials, and School of Materials Science and Engineering,*  
6 *Zhejiang University, Hangzhou 310027, China*

7 \*Corresponding author.

8 *E-mail addresses:* [chenguang\\_fu@zju.edu.cn](mailto:chenguang_fu@zju.edu.cn) (Chenguang Fu), [zhutj@zju.edu.cn](mailto:zhutj@zju.edu.cn) (Tiejun Zhu)

9

# Supplemental Information

## Supplemental Information including:

### Materials and Methods

### Figures S1 to S7

### Note 1

## Supplemental Materials and Methods

**Synthesis of quenched and annealed sample** To synthesize the quenched samples, raw elements Ag (99.9%, shot), Te (99.999%, chunk), and S (99.999%, powder) were weighted according to the stoichiometric  $\text{Ag}_2\text{Te}_{1-x}\text{S}_x$  ( $x = 0 \sim 0.5$ ) into quartz tubes and sealed under high vacuum. To protect the tubes from the explosion, the heating rate was set slowly during the melting process. Firstly, the tubes were heated to 773 K at the rate of 2 K  $\text{min}^{-1}$ , held at this temperature for 4 h, and then heated to 1073 K at the rate of 1 K  $\text{min}^{-1}$ , held at this temperature for 4 h, and then heated to 1273 K at the rate of 0.5 K  $\text{min}^{-1}$ , kept at this temperature for 12 h in a chamber furnace. Subsequently, the tubes were quenched in cold water to obtain final quenched ingots. For obtaining the annealed samples, the quenched ingots were sealed in tubes with evacuating to  $10^{-3}$  Pa, annealed at 723 K for 7 days to facilitate the formation of cubic phase, and naturally cooled to room temperature in the furnace. The quenched and annealed ingots were used for studying TE and mechanical properties. In addition, to obtain the furnace-cooled ingot, the sample was heated to 1273 K at the same heating rate as the quenched sample, held for 12 h, and naturally cooled to room temperature in the furnace.

**Characterization** The phase structure of all samples was characterized by an X-ray diffraction system (XRD, PANalytical, Aeris DY866) equipped with a high-temperature stage using Cu  $K\alpha$  radiation ( $\lambda = 1.5406 \text{ \AA}$ ). The variable temperature XRD patterns were recorded following the heating protocol between 323 K to 773 K. The microstructure and elemental distribution

1 were characterized by field emission scanning electron microscopy (SEM, Hitachi, SU-8010)  
2 equipped with energy-dispersive X-ray spectroscopy (EDS) and electron probe microanalysis  
3 (EPMA, JOEL, JXA-8100) with a wavelength-dispersive spectroscope (WDS). Differential  
4 scanning calorimeter (DSC, TA, Q200) measurements were performed in nitrogen flux to  
5 investigate the phase transition with a heating rate of 5 K min<sup>-1</sup>. Uniaxial compression tests and  
6 tensile tests on the bulk specimens were carried out on a universal machine (Siomt, JVI-20s)  
7 with a loading rate of 0.5 mm min<sup>-1</sup>. The cuboids in the size of 3 × 3 × 6 mm<sup>3</sup> were used for  
8 compression tests and dog bone-shaped specimens (7 × 20 × 1 mm<sup>3</sup>) processed by wire cutting  
9 were used for tensile tests. The electrical conductivity  $\sigma$  and the Seebeck coefficient  $S$  were  
10 simultaneously measured between 300 and 573 K on a commercial Linseis LSR-3 system in a  
11 helium atmosphere. The total thermal conductivity  $\kappa$  was calculated via  $\kappa = D \times C_p \times \rho$ , where the  
12 thermal diffusivity  $D$  was measured by laser flash method (Netzsch, LFA457) and the density  
13  $\rho$  was measured by the Archimedes method, and the specific heat capacity  $C_p$  was estimated  
14 using the Dulong-Petit value. The Hall carrier concentration  $n_H$  and Hall mobility  $\mu_H$  were  
15 calculated by  $n_H = 1/eR_H$  and  $\mu_H = \sigma R_H$  respectively, where  $e$  is the unit charge,  $R_H$  is the Hall  
16 coefficient which was measured by a Mini Cryogen Free Measurement system with the  
17 magnetic field varying from -4 T to 4 T.

18

1 **Supplemental Figures**

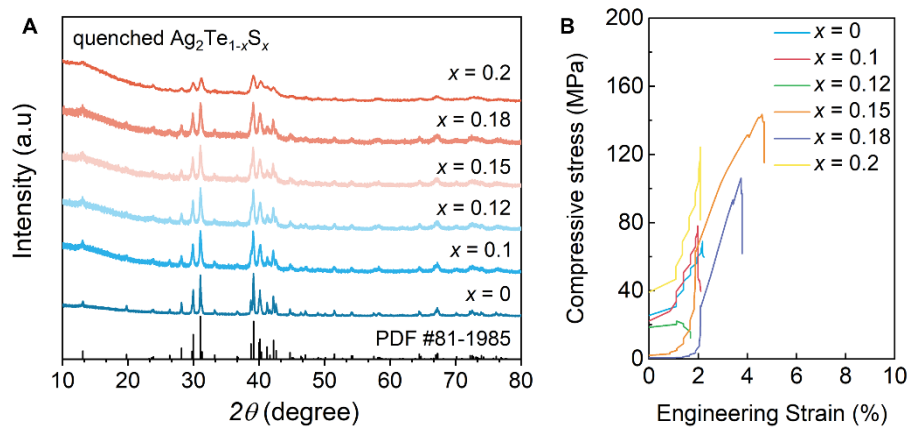

2

3 **Figure S1. Crystal structure and mechanical properties of quenched  $\text{Ag}_2\text{Te}_{1-x}\text{S}_x$  ( $x \leq 0.2$ ).** (A) Powder

4 XRD patterns. (B) Compressive stress-strain curves.

5

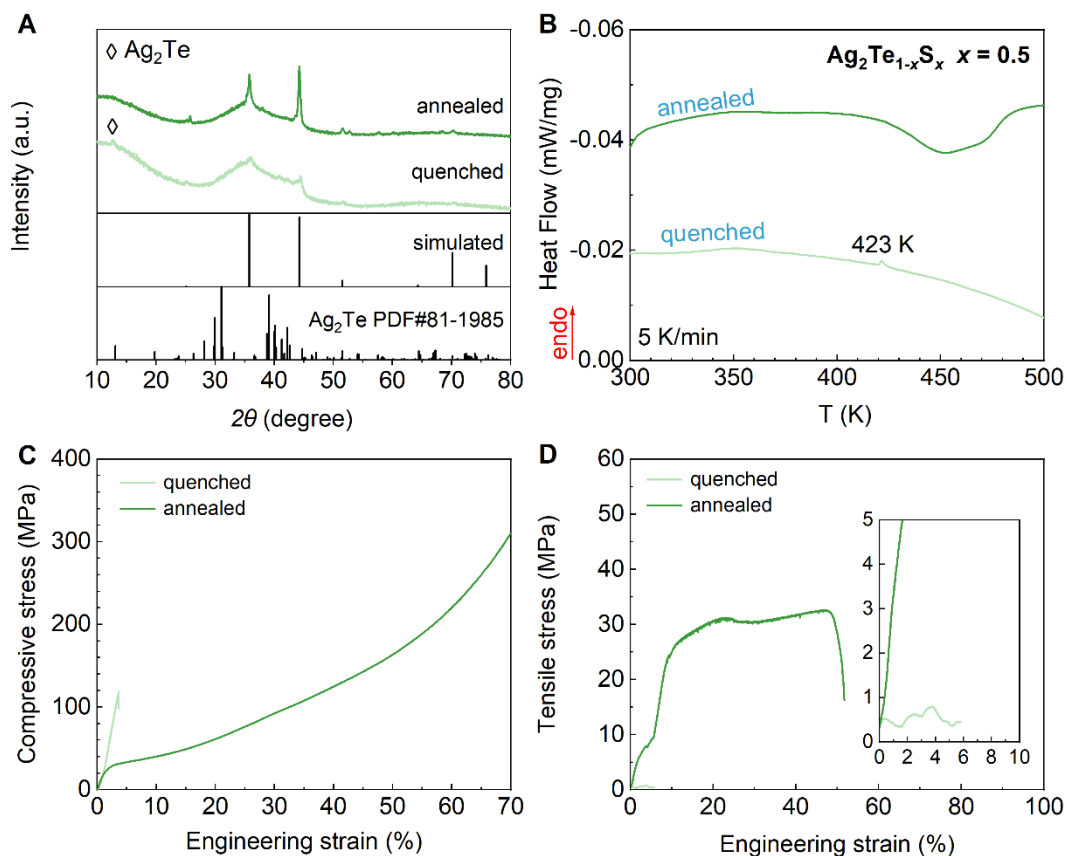

1  
2 **Figure S2. Elimination of monoclinic  $\text{Ag}_2\text{Te}$  phase in inorganic semiconductor  $\text{Ag}_2\text{Te}_{0.5}\text{S}_{0.5}$ .** (A) Room-  
3 temperature bulk XRD patterns of the quenched and annealed  $\text{Ag}_2\text{Te}_{0.5}\text{S}_{0.5}$  samples. The simulated patterns  
4 by VESTA are displayed for comparison. (B) DSC heating curves for quenched and annealed  $\text{Ag}_2\text{Te}_{0.5}\text{S}_{0.5}$   
5 samples with a heating rate of 5 K/min. Stress-strain diagrams for quenched and annealed  $\text{Ag}_2\text{Te}_{0.5}\text{S}_{0.5}$   
6 samples in the compressive test (C) and the tensile test (D).

7

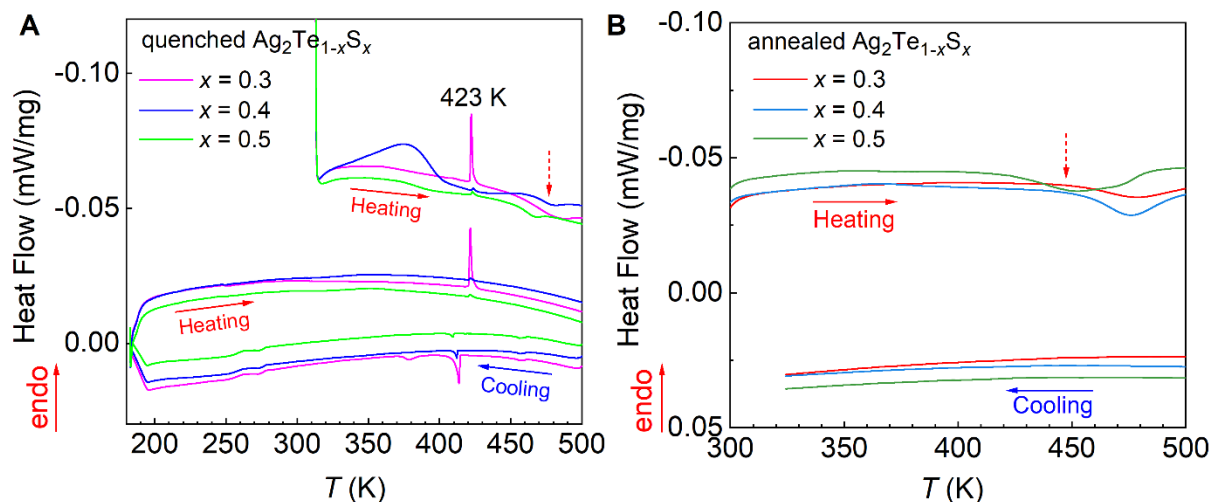

1  
2 **Figure S3. DSC curves for quenched and annealed  $\text{Ag}_2\text{Te}_{1-x}\text{S}_x$  specimens with a heating rate of 5 K/min.**

3 (A) Quenched  $\text{Ag}_2\text{Te}_{1-x}\text{S}_x$ . The curves of the first heating cycle for the quenched specimens have been shifted  
4 up along the Y axis to avoid overlapping with other measured curves. (B) Annealed  $\text{Ag}_2\text{Te}_{1-x}\text{S}_x$ .

5 Broad bumps around  $2\theta = 30\text{--}50^\circ$  in the bulk XRD results (Figure 2C) reveal the partial  
6 amorphization of the  $\text{Ag}_2\text{Te}_{1-x}\text{S}_x$  materials. In order to detect the glass transition of the solid  
7 amorphous phase in  $\text{Ag}_2\text{Te}_{1-x}\text{S}_x$ , which is an endothermic step change occurred in the heating  
8 DSC traces, low-temperature DSC curves for quenched  $\text{Ag}_2\text{Te}_{1-x}\text{S}_x$  are displayed in Figure S3A.  
9 The process of the thermal scan for the low-temperature DSC curves is firstly heating to the set  
10 temperature, then cooling to the low temperature (200 K), and heating to the set temperature  
11 from the low temperature again. No clear glass transitions are observed in the DSC traces of  
12 the quenched specimens. A slight dip, which is only observed in the first heating cycle of the  
13 thermal scan for all the quenched and annealed  $\text{Ag}_2\text{Te}_{1-x}\text{S}_x$  samples, might be due to the  
14 crystallization of the amorphous phase. However, the wide exothermic peaks of the  
15 crystallization around 450 ~ 500 K are irreversible, and cannot be detected in the following  
16 cooling and reheating process.

17

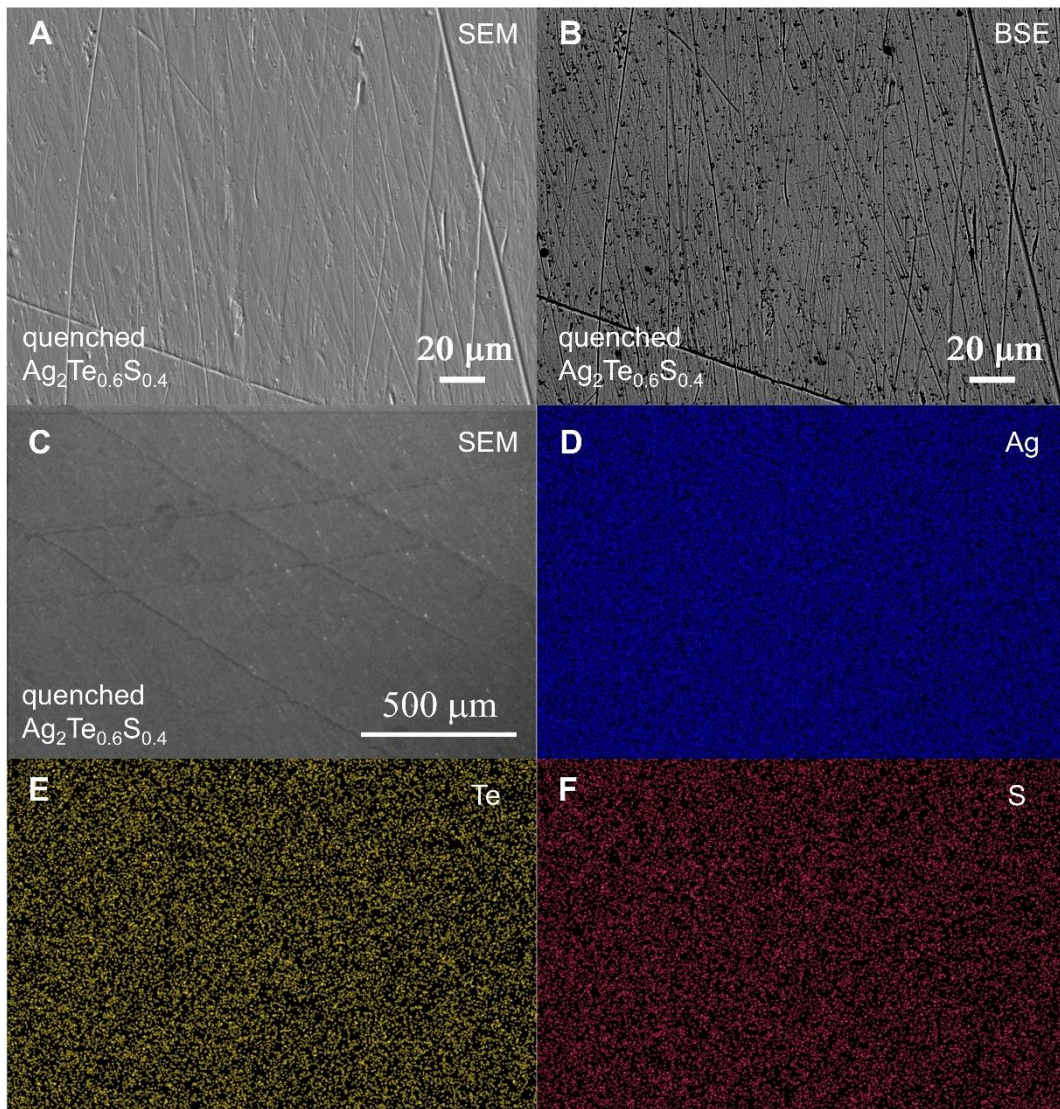

1

2 **Figure S4. Microstructure of quenched  $\text{Ag}_2\text{Te}_{0.6}\text{S}_{0.4}$  sample.** (A) EPMA secondary electron image, and (B)  
3 EPMA backscattered electron image of the polished surfaces. (C) SEM images of the polished surface. (D)  
4 Ag, (E) Te and (F) S elemental distribution in (C).

5

6

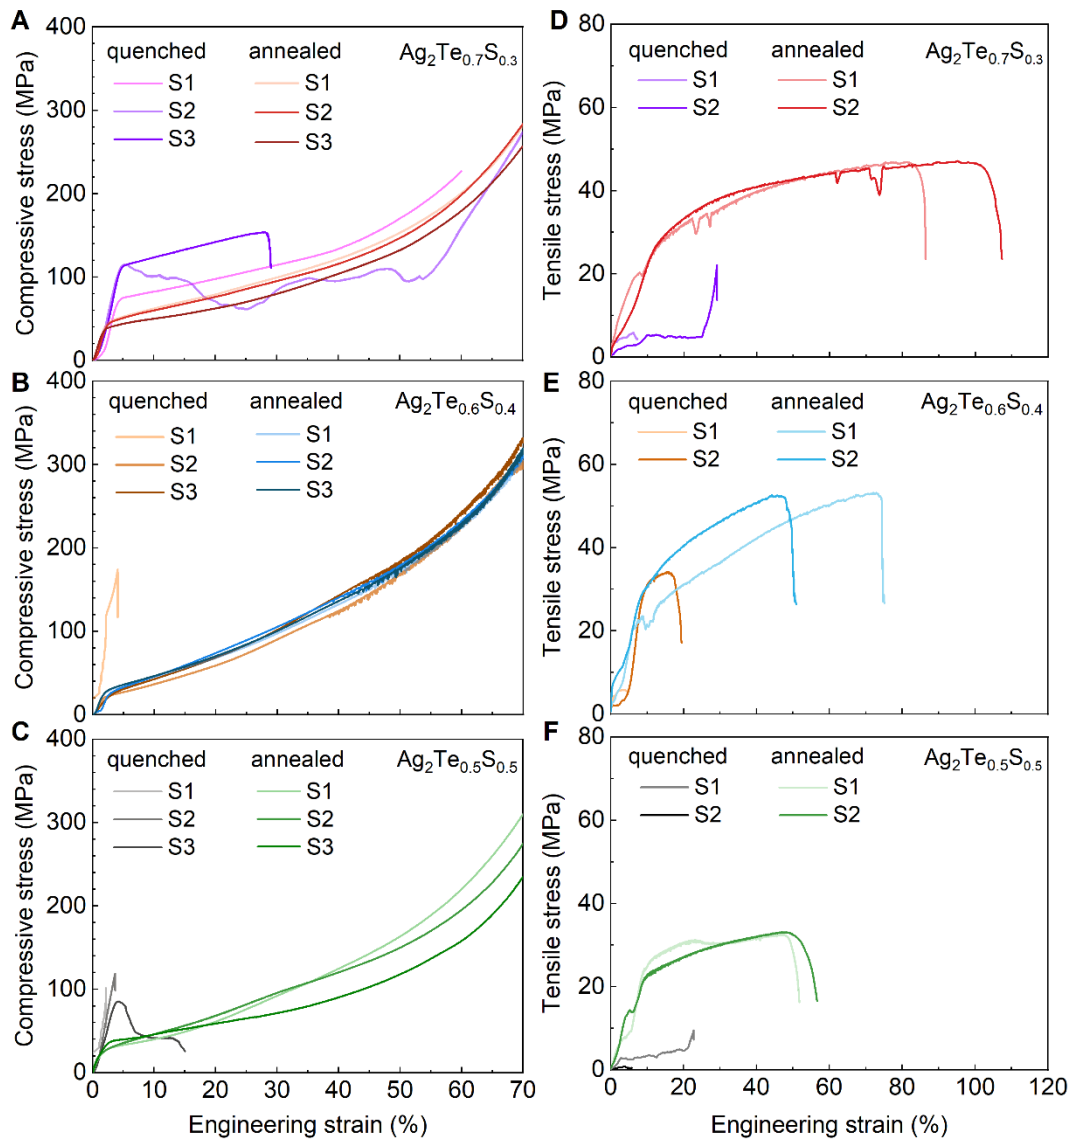

1  
2 **Figure S5. Reproducibility and stability of mechanical properties for inorganic semiconductor  $\text{Ag}_2\text{Te}_{1-x}\text{S}_x$ .**  
3  **$x = 0.3, 0.4,$  and  $0.5$ )** Stress-strain diagrams for quenched and annealed  $\text{Ag}_2\text{Te}_{1-x}\text{S}_x$  specimens in the  
4 compressive test (A), (B) and (C) and the tensile test (D), (E) and (F). S1, S2 and S3 indicate the measured  
5 specimens processed from the same ingot.



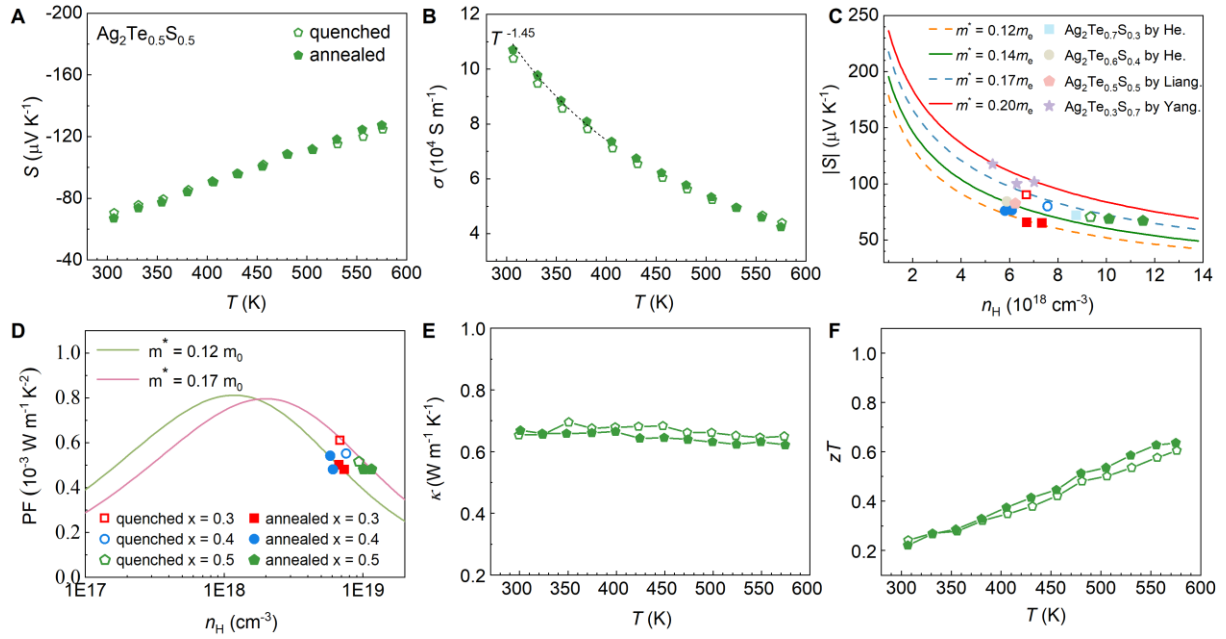

1

2 **Figure S6. Temperature dependence of thermoelectric properties for inorganic semiconductor**

3  **$\text{Ag}_2\text{Te}_{0.5}\text{S}_{0.5}$**  (A) Seebeck coefficient  $S$  and (B) electrical conductivity  $\sigma$  for quenched and annealed

4  $\text{Ag}_2\text{Te}_{0.5}\text{S}_{0.5}$ . (C) Pisarenko plots for  $\text{Ag}_2\text{Te}_{1-x}\text{S}_x$  ( $x = 0.3, 0.4$  and  $0.5$ ) specimens, the lines are calculated by

5 the SPB model with different density-of-states effective mass  $m^*$ . The data for  $\text{Ag}_2\text{Te}_{0.7}\text{S}_{0.3}^1$ ,  $\text{Ag}_2\text{Te}_{0.6}\text{S}_{0.4}^1$ ,

6  $\text{Ag}_2\text{Te}_{0.5}\text{S}_{0.5}^2$ , and  $\text{Ag}_2\text{Te}_{0.3}\text{S}_{0.7}^3$  reported previously are added for comparison. (D) Carrier concentration

7 dependence of power factor  $\text{PF}$  for quenched (hollow symbols) and annealed (solid symbols)  $\text{Ag}_2\text{Te}_{1-x}\text{S}_x$  ( $x$

8  $= 0.3, 0.4$ , and  $0.5$ ) at 300 K. The curves are generated by SPB model. (E) Total thermal conductivity  $\kappa$  and

9 (F)  $zT$  values for quenched and annealed  $\text{Ag}_2\text{Te}_{0.5}\text{S}_{0.5}$ .

10

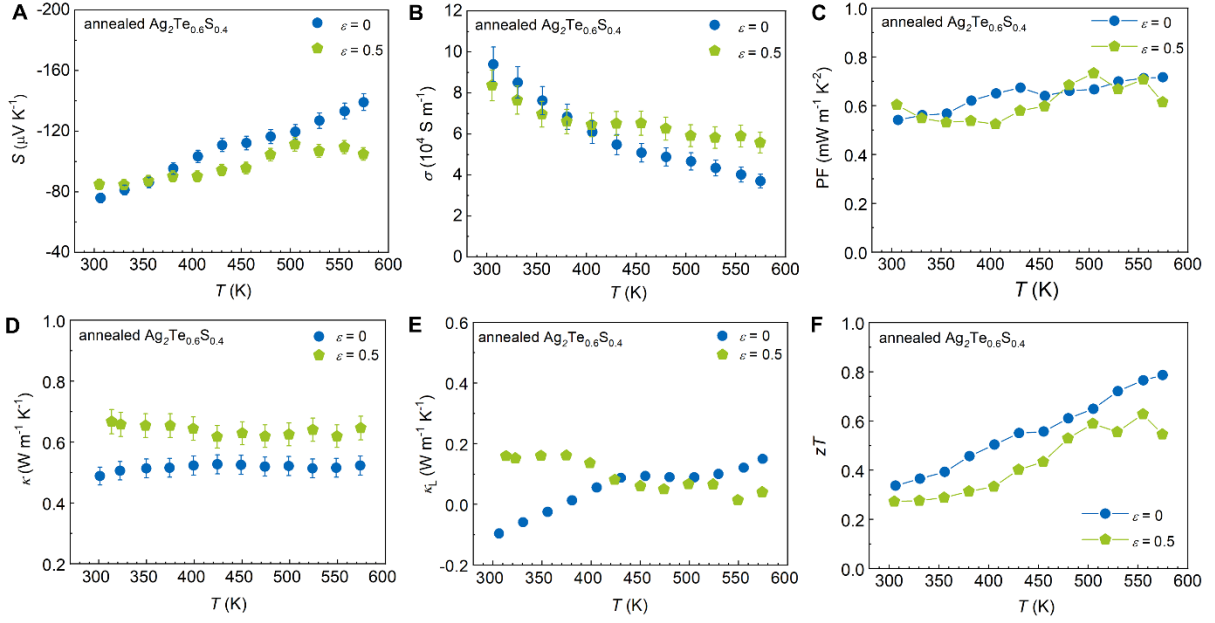

**Figure S7. Effect of compressive deformation on the thermoelectric properties of plastic annealed  $\text{Ag}_2\text{Te}_{0.6}\text{S}_{0.4}$  sample.** Temperature dependence of (A) Seebeck coefficient, (B) electrical conductivity, (C) power factor, (D) total thermal conductivity, (E) lattice thermal conductivity, and (F)  $zT$  values.

The most significant variation is that the thermal conductivity increases with the increasing compressive strain  $\varepsilon$ . Considering that the values of the Seebeck coefficient and the electrical conductivity at room temperature are almost unchanged, the increased thermal conductivity of  $\varepsilon = 0.5$  sample should mainly originate from the increased lattice thermal conductivity. For metals and alloys, the mechanism of plastic deformation is slip and twinning, and the density of dislocations will increase drastically during plastic deformation, which may contribute to a reduction in lattice thermal conductivity. However, the anomalous increase of lattice thermal conductivity with the introduction of compressive deformation in annealed  $\text{Ag}_2\text{Te}_{0.6}\text{S}_{0.4}$  suggests that the plastic deformation mechanism of  $\text{Ag}_2\text{Te}_{1-x}\text{S}_x$  materials is independent of the movement of dislocations

1 **Supplemental Note 1**

2 **Single parabolic band (SPB) model.** The electrical transport properties of  $\text{Ag}_2\text{Te}_{1-x}\text{S}_x$  were  
3 analyzed using the SPB model obtained from the Boltzmann transport equation within the  
4 relaxation time approximation. Assuming the acoustic phonon scattering limits the carrier  
5 mobility and the minority carrier transport is negligible, the related parameters can be expressed  
6 below

7 
$$F_i(\eta) = \int_0^\infty \frac{x^i}{1 + \exp(x - \eta)} dx \quad (1)$$

8 
$$S = -\frac{k_B}{e} \left( \frac{2F_1}{F_0} - \eta \right) \quad (2)$$

9 Where  $\eta$  is the reduced Fermi level,  $k_B$  is the Boltzmann constant,  $e$  is the magnitude of charge  
10 of an electron or hole,  $F_i$  is the Fermi integral, and  $S$  is the Seebeck coefficient.

11 
$$r_H = \frac{3}{2} F_{1/2} \frac{F_{-1/2}}{2F_0^2} \quad (3)$$

12 
$$n_H = \frac{4\pi(2m_d^*k_B T)^{3/2} F_{1/2}}{h^3 r_H}$$

13 Where  $r_H$  is the Hall factor,  $m_d^*$  is the DOS effective mass,  $h$  is the Plank constant,  $T$  is the  
14 absolute temperature, and  $n_H$  is the Hall carrier concentration.

15 
$$\mu_H = \mu_0 \frac{F_{-1/2}}{2F_0} \quad (4)$$

16 
$$\text{PF} = S^2 n_H \mu_H e \quad (5)$$

17 Where  $\mu_0$  is the SPB mobility parameter,  $\mu_H$  is the Hall mobility, and PF is the theoretical power  
18 factor.

## 1 Reference

- 2 1. He, S. Y., Li, Y. B., Liu, L., et al. (2020). Semiconductor glass with superior flexibility and high room  
3 temperature thermoelectric performance. *Sci. Adv.* **6**, eaaz8423.
- 4 2. Liang, X. and Chen, C. (2021). Ductile inorganic amorphous/crystalline composite  $\text{Ag}_4\text{TeS}$  with phonon-  
5 glass electron-crystal transport behavior and excellent stability of high thermoelectric performance on  
6 plastic deformation. *Acta Mater.* **218**, 117231.
- 7 3. Yang, S. Q., Gao, Z. Q., Qiu, P. F., et al. (2021). Ductile  $\text{Ag}_{20}\text{S}_7\text{Te}_3$  with Excellent Shape-Conformability  
8 and High Thermoelectric Performance. *Adv. Mater.* **33**, 2007681.
